# Supplementary material for: Reads Binning Improves the Assembly of Viral Genome Sequences From Metagenomic Samples
Source: Front Microbiol. 2021 May 21;12:664560. doi: 10.3389/fmicb.2021.664560 (PMC8175635; doi:10.3389/fmicb.2021.664560)
Supplement: Supplementary file 2 [file Data_Sheet_2.xlsx]

## Sheet: before May 2015
Bacteria NCBI accession	Virus NCBI accession
NC_007795.1	NC_000866
NC_003197.1	NC_000867
NC_002163.1	NC_000871
NC_003143.1	NC_000872
NC_004461.1	NC_000896
NC_012660.1	NC_000902
NC_002662.1	NC_000924
NC_003210.1	NC_000929
NC_004722.1	NC_000935
NC_003902.1	NC_001270
NC_003366.1	NC_001271
NC_002944.2	NC_001317
NC_002945.3	NC_001330
NC_004572.3	NC_001331
NC_009053.1	NC_001332
NC_003112.2	NC_001335
NC_002737.1	NC_001338
NC_003098.1	NC_001341
NC_000907.1	NC_001365
NC_005042.1	NC_001396
NC_002528.1	NC_001416
NC_002947.3	NC_001417
NC_002488.3	NC_001418
NC_000922.1	NC_001420
NC_011985.1	NC_001421
NC_004342.2	NC_001422
NC_020800.1	NC_001426
NC_003997.3	NC_001447
NC_004337.2	NC_001604
NC_007005.1	NC_001609
NC_002516.2	NC_001628
NC_008711.1	NC_001629
NC_009085.1	NC_001697
NC_004116.1	NC_001706
NC_009442.1	NC_001730
NC_004307.2	NC_001741
NC_003454.1	NC_001825
NC_005139.1	NC_001835
NC_010519.1	NC_001884
NC_007295.1	NC_001890
NC_008639.1	NC_001895
NC_006347.1	NC_001900
NC_012026.1	NC_001901
NC_007606.1	NC_001902
NC_002942.5	NC_001909
NC_006448.1	NC_001942
NC_007384.1	NC_001954
NC_006833.1	NC_001956
NC_007604.1	NC_001978
NC_016901.1	NC_001998
NC_009513.1	NC_002014
NC_000117.1	NC_002072
NC_009848.1	NC_002166
NC_009438.1	NC_002167
NC_006461.1	NC_002180
NC_011000.1	NC_002185
NC_006348.1	NC_002194
NC_003450.3	NC_002214
NC_007164.1	NC_002321
NC_007799.1	NC_002362
NC_000908.2	NC_002363
NC_007484.1	NC_002371
NC_005957.1	NC_002484
NC_002505.1	NC_002486
NC_003295.1	NC_002515
NC_007205.1	NC_002519
NC_007613.1	NC_002628
NC_008611.1	NC_002643
NC_015760.1	NC_002649
NC_007618.1	NC_002656
NC_009708.1	NC_002661
NC_008054.1	NC_002666
NC_008508.1	NC_002667
NC_007778.1	NC_002668
NC_007633.1	NC_002669
NC_003919.1	NC_002670
NC_008783.1	NC_002671
JXSL01	NC_002700
NC_008599.1	NC_002703
NC_006834.1	NC_002730
NC_013853.1	NC_002747
NC_007712.1	NC_002796
NC_009380.1	NC_003050
NC_009497.1	NC_003085
NC_011978.1	NC_003157
NC_008209.1	NC_003214
NC_007347.1	NC_003216
NC_007907.1	NC_003278
NC_009348.1	NC_003287
NC_008528.1	NC_003288
NC_008526.1	NC_003291
NC_004603.1	NC_003298
NC_009953.1	NC_003299
NC_002971.3	NC_003300
NC_002937.3	NC_003301
NC_010002.1	NC_003309
NC_007940.1	NC_003313
NC_021744.1	NC_003315
NC_010682.1	NC_003324
NZ_CM002692.1	NC_003327
NC_010263.2	NC_003345
NC_018887.1	NC_003356
FP929046.1	NC_003387
NC_008618.1	NC_003390
AKIH01	NC_003438
NC_009142.1	NC_003444
ADBS01	NC_003460
ACXY01	NC_003524
NC_017490.1	NC_003714
NC_009488.1	NC_003715
NC_010610.1	NC_003716
NC_012808.1	NC_003793
NC_010505.1	NC_003907
NC_009706.1	NC_004066
NC_002950.2	NC_004084
NC_011374.1	NC_004086
NC_005364.2	NC_004087
CP000086.1	NC_004112
NC_008571.1	NC_004165
NC_002162.1	NC_004166
NC_018286.1	NC_004167
NC_020911.1	NC_004170
NC_006840.2	NC_004171
NZ_CP008726.1	NC_004172
NC_009698.1	NC_004173
NC_001318.1	NC_004174
CP008730.1	NC_004175
NC_009667.1	NC_004301
NC_000963.1	NC_004302
NC_000919.1	NC_004303
NZ_CP007045.1	NC_004305
NC_010407.1	NC_004306
NC_010103.1	NC_004313
NC_007760.1	NC_004333
NC_010602.1	NC_004348
NC_010612.1	NC_004456
NC_016845.1	NC_004466
NC_004668.1	NC_004584
NC_017249.1	NC_004585
NC_010296.1	NC_004586
NC_010551.1	NC_004587
NC_013714.1	NC_004588
NC_019042.1	NC_004589
NC_007761.1	NC_004615
NC_018747.1	NC_004616
NC_017287.1	NC_004617
NC_011835.1	NC_004629
NC_009012.1	NC_004664
NC_007963.1	NC_004665
NC_010161.1	NC_004678
ABVL01	NC_004679
NC_014551.1	NC_004680
NC_017960.1	NC_004681
NC_004350.2	NC_004682
NC_013446.2	NC_004683
NC_002946.2	NC_004684
NZ_CM000743.1	NC_004685
NC_011138.3	NC_004686
NC_010943.1	NC_004687
NC_014638.1	NC_004688
NC_012803.1	NC_004689
NC_012470.1	NC_004735
NZ_CP009364.1	NC_004736
NZ_CP009997.1	NC_004740
ABQU01	NC_004745
NZ_CM000776.2	NC_004746
NC_006526.2	NC_004775
NC_011852.1	NC_004777
NC_013209.1	NC_004813
NC_002677.1	NC_004814
JOOT01	NC_004820
NC_002663.1	NC_004821
NC_010336.1	NC_004827
NC_017448.1	NC_004831
AAMR01	NC_004902
NC_022905.1	NC_004913
NC_015857.1	NC_004914
ACAJ01	NC_004927
NC_020995.1	NC_004928
NC_002696.2	NC_004996
NC_012880.1	NC_005045
NC_014103.1	NC_005056
NC_012724.2	NC_005066
ABCB02	NC_005069
ABAW02	NC_005083
ACCK01	NC_005091
ACBZ01	NC_005131
ACCL02	NC_005135
ABFK02	NC_005178
ABIL02	NC_005258
ABGD02	NC_005260
ABEZ02	NC_005262
ABIK02	NC_005263
FP929044.1	NC_005265
ABFX02	NC_005282
ABXJ01	NC_005284
AZJE01	NC_005294
ABKW02	NC_005340
NC_011959.1	NC_005342
ABIY02	NC_005344
ABJL02	NC_005345
ABVP01	NC_005354
NC_017731.1	NC_005355
ABVR01	NC_005356
NC_016826.1	NC_005357
FP929054.1	NC_005360
FP929055.1	NC_005361
ABEE02	NC_005822
AAYI02	NC_005830
AAXG02	NC_005833
ABFY02	NC_005841
ACEP01	NC_005856
JAGQ01	NC_005857
ACBY02	NC_005859
ADLQ01	NC_005872
AAVL02	NC_005879
ABXU01	NC_005880
AGXF01	NC_005882
AAVN02	NC_005884
AAXF02	NC_005885
AGYH01	NC_005886
ABAX03	NC_005887
AAXB02	NC_005891
AAXE02	NC_005892
NC_019382.1	NC_005893
NC_002967.9	NC_005948
NC_003047.1	NC_005964
NC_002929.2	NC_006268
AAYH02	NC_006294
AWVF01	NC_006356
ABEY02	NC_006548
ABFZ02	NC_006552
NC_002678.2	NC_006556
NC_012560.1	NC_006557
NC_002977.6	NC_006565
NC_002940.2	NC_006820
NC_003103.1	NC_006882
NC_009446.1	NC_006883
NC_004757.1	NC_006884
NC_011761.1	NC_006936
NC_018828.1	NC_006938
NC_008255.1	NC_006940
NC_007643.1	NC_006945
NC_010175.1	NC_006949
NC_014833.1	NC_006953
NC_001263.1	NC_007019
NC_009785.1	NC_007021
NC_003030.1	NC_007022
NC_008530.1	NC_007023
NC_002935.2	NC_007024
NC_000912.1	NC_007045
CM001048.1	NC_007046
NC_002771.1	NC_007047
NC_004432.1	NC_007048
NC_007517.1	NC_007049
NC_008800.1	NC_007050
NC_007794.1	NC_007051
NC_002936.3	NC_007052
NC_000918.1	NC_007053
NC_010628.1	NC_007054
NC_003361.3	NC_007055
NC_002620.2	NC_007056
NC_002570.2	NC_007057
NC_003888.3	NC_007058
NC_007973.1	NC_007059
NC_007333.1	NC_007060
NC_003155.4	NC_007061
NC_002939.5	NC_007062
NC_007503.1	NC_007063
NC_002978.6	NC_007064
NC_004344.2	NC_007065
NC_003911.12	NC_007066
NC_004193.1	NC_007145
NC_003910.7	NC_007149
NC_002932.3	NC_007189
NC_004369.1	NC_007291
NC_004347.2	NC_007409
NC_007797.1	NC_007456
NC_004113.1	NC_007458
NC_008531.1	NC_007461
NC_012483.1	NC_007497
NC_007798.1	NC_007501
NC_004547.2	NC_007581
NC_007912.1	NC_007603
NC_008312.1	NC_007623
NC_010645.1	NC_007637
NC_015761.1	NC_007709
NC_012004.1	NC_007710
NC_007899.1	NC_007734
NC_004663.1	NC_007804
NC_005027.1	NC_007805
NC_018533.1	NC_007806
NC_004557.1	NC_007807
NC_006814.3	NC_007808
NC_014034.1	NC_007809
NC_004552.2	NC_007810
NC_008011.1	NC_007814
NC_021082.1	NC_007817
NC_004567.2	NC_007821
NC_020064.1	NC_007856
NC_004917.1	NC_007902
NC_005956.1	NC_007914
NC_008497.1	NC_007917
NC_008525.1	NC_007918
NC_006087.1	NC_007924
AAGP01	NC_007967
NC_004829.2	NC_008152
NC_008148.1	NC_008193
NC_009664.2	NC_008194
NC_007354.1	NC_008195
NC_014117.1	NC_008196
NC_008825.1	NC_008197
NC_006085.1	NC_008198
NZ_CP007181.1	NC_008199
AACR01	NC_008200
NC_005061.1	NC_008201
NC_005090.1	NC_008202
NC_005085.1	NC_008203
NZ_AABW01000001.1	NC_008204
NC_008095.1	NC_008205
NC_011025.1	NC_008206
NC_005126.1	NC_008207
NC_005125.1	NC_008208
NC_005303.2	NC_008265
CP000284.1	NC_008294
NC_007644.1	NC_008296
NC_010556.1	NC_008355
NC_006055.1	NC_008363
AADV02	NC_008364
NC_009256.1	NC_008367
NC_007168.1	NC_008370
NC_009505.1	NC_008371
NC_005861.1	NC_008376
NC_007984.1	NC_008464
NC_012039.1	NC_008515
AEPU01	NC_008562
NC_014760.1	NC_008574
NC_012440.1	NC_008575
NC_015713.1	NC_008583
NC_012438.1	NC_008584
AAEW02	NC_008617
NC_010803.1	NC_008689
NC_009337.1	NC_008694
NC_013961.1	NC_008695
NC_016612.1	NC_008717
NC_016620.1	NC_008720
NC_010554.1	NC_008721
NC_009617.1	NC_008722
NC_008536.1	NC_008723
CP000822.1	NC_008798
NC_009778.1	NC_008799
NC_014121.1	NC_009014
NC_011059.1	NC_009015
NC_006138.1	NC_009016
NC_009879.1	NC_009018
NC_009881.1	NC_009231
NC_013929.1	NC_009232
NC_009925.1	NC_009234
NC_011060.1	NC_009235
NC_008554.1	NC_009236
NC_008346.1	NC_009237
CP000109.2	NC_009382
NC_007575.1	NC_009447
NC_007404.1	NC_009452
NC_006300.1	NC_009514
NC_006361.1	NC_009526
NC_006370.1	NC_009531
NC_012778.1	NC_009540
NC_008740.1	NC_009541
NC_012115.1	NC_009542
NC_006513.1	NC_009543
NC_007929.1	NC_009551
NC_010981.1	NC_009552
NC_006582.1	NC_009554
NC_006677.1	NC_009597
AAGB01	NC_009603
NC_009655.1	NC_009604
NC_011989.1	NC_009643
AAOB01	NC_009737
NC_014219.1	NC_009760
NC_009614.1	NC_009761
NC_008609.1	NC_009762
NC_008700.1	NC_009763
NC_007954.1	NC_009799
NC_008345.1	NC_009803
NC_013892.1	NC_009804
NC_007498.2	NC_009810
NC_021084.1	NC_009811
NC_014228.1	NC_009812
AAMX01	NC_009813
AAWS01	NC_009814
NC_014147.1	NC_009815
ADNC01	NC_009816
NC_021002.1	NC_009817
NC_008781.1	NC_009818
NC_013716.1	NC_009819
NC_008025.1	NC_009820
NC_009253.1	NC_009821
NC_013949.1	NC_009875
NC_010337.2	NC_009877
ABCK01	NC_009878
NC_016011.1	NC_009884
NC_013891.1	NC_009904
NC_008555.1	NC_009935
NZ_AOFE01000000	NC_009936
ATUP01	NC_009965
AAMO01	NC_009986
AAOT01	NC_009987
AAOG01	NC_009990
NC_008228.1	NC_009993
AAOH01	NC_010105
NC_009767.1	NC_010106
NC_016640.1	NC_010116
NC_009437.1	NC_010147
NC_009138.1	NC_010152
NC_012779.2	NC_010153
NC_014752.1	NC_010154
NC_007964.1	NC_010155
NC_007406.1	NC_010179
AAOF01	NC_010237
NC_007716.1	NC_010324
NC_007722.1	NC_010325
NC_009615.1	NC_010326
NC_020517.1	NC_010342
AANZ01	NC_010353
NC_014328.1	NC_010355
ABXE01	NC_010363
NC_018721.1	NC_010391
AAOW01	NC_010392
AAQH01	NC_010393
AAOJ01	NC_010463
NC_014230.1	NC_010495
AANC01	NC_010537
AATQ01	NC_010576
AAPD01	NC_010583
AAVT01	NC_010807
AAPI01	NC_010808
AAPJ01	NC_010811
AAMT01	NC_010821
AATS01	NC_010945
NC_010184.1	NC_011019
NC_008268.1	NC_011020
NC_007292.1	NC_011021
NC_007109.1	NC_011022
NC_009009.1	NC_011023
NC_010397.1	NC_011038
NC_013456.1	NC_011039
NC_009092.1	NC_011040
NC_008048.1	NC_011041
NC_007908.1	NC_011042
NC_007614.1	NC_011043
NC_008344.1	NC_011044
NC_007969.1	NC_011045
NC_007514.1	NC_011046
NC_007350.1	NC_011048
NC_009828.1	NC_011054
ABCE01	NC_011055
NC_014623.1	NC_011056
NC_008340.1	NC_011057
AAQF01	NC_011085
NC_008726.1	NC_011103
NC_008789.1	NC_011104
NC_009483.1	NC_011107
NC_009484.1	NC_011142
NC_008009.1	NC_011165
NC_007645.1	NC_011166
NC_014622.1	NC_011167
NC_016023.1	NC_011201
NC_014323.1	NC_011216
NC_014012.1	NC_011217
NC_009720.1	NC_011222
NC_010528.1	NC_011267
NC_010471.1	NC_011269
NC_009922.1	NC_011270
NC_009441.1	NC_011271
NC_015856.1	NC_011272
NC_013861.1	NC_011273
NC_008578.1	NC_011285
AALD02	NC_011287
NZ_CP009801.1	NC_011288
NC_012796.1	NC_011289
NC_007677.1	NC_011290
NC_010001.1	NC_011291
NC_012526.1	NC_011292
NC_008570.1	NC_011308
NC_008709.1	NC_011318
NC_007759.1	NC_011344
NC_015677.1	NC_011356
NC_009636.1	NC_011357
NC_009972.1	NC_011373
NC_011899.1	NC_011398
AASE01	NC_011399
CP000655.1	NC_011421
NC_014215.1	NC_011523
NC_011831.1	NC_011534
NC_009718.1	NC_011551
AAQJ02	NC_011589
AAQP01	NC_011611
AASF01	NC_011612
NC_008027.1	NC_011613
NC_009434.1	NC_011614
NC_008593.1	NC_011645
CP005941.1	NC_011703
NZ_CP009795.1	NC_011756
NC_008610.1	NC_011801
CP000792.1	NC_011802
CP000702.1	NC_011810
NC_008343.1	NC_011811
NC_008278.1	NC_011976
NC_010622.1	NC_012027
NC_009901.1	NC_012091
NC_009952.1	NC_012092
NC_011898.1	NC_012093
NC_010814.1	NC_012223
NC_010506.1	NC_012418
NC_009439.1	NC_012419
NC_009832.1	NC_012530
NC_010681.1	NC_012558
AAWL01	NC_012635
NC_009719.1	NC_012638
NC_011566.1	NC_012662
AATR01	NC_012663
NC_010003.1	NC_012696
NC_011146.1	NC_012697
NC_008512.1	NC_012740
NC_008786.1	NC_012741
NC_009616.1	NC_012742
NC_008229.1	NC_012743
NC_008347.1	NC_012749
NC_009511.1	NC_012753
NC_009943.1	NC_012756
NC_011229.1	NC_012757
NC_011420.2	NC_012784
AAUW01	NC_012788
AAUX01	NC_012868
AAVS01	NC_012884
AAVV01	NC_013021
NC_009328.1	NC_013055
NC_009831.1	NC_013059
AAXX01	NC_013085
AAYA01	NC_013152
AAXZ01	NC_013155
NC_010376.1	NC_013195
NC_009454.1	NC_013585
NC_023065.1	NC_013587
ABZS01	NC_013588
ABBV01	NC_013594
ABBW01	NC_013598
ABBX01	NC_013599
NC_013009.1	NC_013600
NC_010168.1	NC_013638
NC_010163.1	NC_013643
NC_009937.1	NC_013644
NC_011244.1	NC_013645
NC_009465.1	NC_013646
NC_012633.1	NC_013647
NC_009900.1	NC_013648
ABHC01	NC_013649
NC_003869.1	NC_013650
ABCJ01	NC_013651
ABHI01	NC_013691
ABSJ01	NC_013692
NZ_CM002917.1	NC_013693
ABIB01	NC_013694
NC_016751.1	NC_013696
ABCP01	NC_013697
JRQD01	NC_013698
ABRS01	NC_013758
ABID01	NC_013936
ABCS01	NC_014036
ABXF01	NC_014099
NC_015730.1	NC_014229
ACCU01	NC_014260
ABSI01	NC_014321
ABCH01	NC_014322
ABFU01	NC_014457
NC_010725.1	NC_014458
NC_010382.1	NC_014459
AAZW01	NC_014460
AAXS01	NC_014461
NC_011768.1	NC_014467
AAZV01	NC_014595
NZ_CP009488.1	NC_014635
NC_010644.1	NC_014636
NZ_ABCY02000001.1	NC_014660
NC_011144.1	NC_014661
NC_009613.3	NC_014662
AGYK01	NC_014663
NC_010830.1	NC_014792
NC_010571.1	NC_014900
NC_011886.1	NC_014901
NC_010524.1	NC_015157
NC_009714.1	NC_015158
NC_015145.1	NC_015159
NC_010718.1	NC_015208
NC_011999.1	NC_015209
NC_020133.1	NC_015210
NC_010334.1	NC_015249
NC_011894.1	NC_015250
ABLD01	NC_015251
NC_010694.1	NC_015252
NC_011666.1	NC_015253
ABOX02	NC_015254
NC_010581.1	NC_015262
NC_020419.1	NC_015263
NC_012108.1	NC_015264
ABGO01	NC_015265
NC_010424.1	NC_015266
AZAN01	NC_015269
NC_012489.1	NC_015270
NC_012490.1	NC_015271
NC_009715.1	NC_015272
NC_010655.1	NC_015273
NC_007204.1	NC_015274
NC_007298.1	NC_015279
NZ_CP002190.1	NC_015280
NC_005362.1	NC_015281
NC_014033.1	NC_015282
NZ_ABIZ01000001.1	NC_015283
NC_007413.1	NC_015284
NC_007294.1	NC_015285
NC_006142.1	NC_015286
NC_006908.1	NC_015287
NC_006512.1	NC_015288
NC_013385.1	NC_015289
NC_006177.1	NC_015290
NC_008260.1	NC_015292
NC_009633.1	NC_015293
NC_007512.1	NC_015294
NC_008686.1	NC_015295
NC_006510.1	NC_015296
NC_007576.1	NC_015297
ABIC01	NC_015453
CP002808.1	NC_015454
ACCR02	NC_015456
AATP01	NC_015457
NC_014414.1	NC_015463
AAOE01	NC_015464
JSAQ01	NC_015465
NZ_CM002299.1	NC_015466
NC_008710.1	NC_015568
ABXG01	NC_015569
NC_015138.1	NC_015584
NC_007481.1	NC_015585
NC_013222.1	NC_015586
AALY01	NC_015719
NC_023134.1	NC_015720
NC_008358.1	NC_015721
AALC02	NC_015785
NC_009850.1	NC_015933
FP565176.1	NC_015937
ABEA03	NC_015938
NC_011047.1	NC_016071
NC_014751.1	NC_016073
AAMS01	NC_016158
NC_011653.1	NC_016160
NC_015711.1	NC_016161
ADVG01	NC_016162
NC_016946.1	NC_016163
ABVV01	NC_016164
ABVW01	NC_016165
NC_014010.1	NC_016166
NC_010162.1	NC_016434
NC_010617.1	NC_016435
NC_010170.1	NC_016562
NC_010995.1	NC_016563
NC_014814.1	NC_016564
NC_013508.1	NC_016565
NZ_CM000950.1	NC_016566
NZ_CM000951.1	NC_016567
NC_014614.1	NC_016568
ABVK02	NC_016569
ABKB02	NC_016570
NC_020449.1	NC_016571
NC_015684.1	NC_016650
NC_011567.1	NC_016651
NC_013791.2	NC_016652
NZ_CP007025.1	NC_016653
CP000975.1	NC_016654
NC_018610.1	NC_016655
NC_014014.1	NC_016656
NC_011565.1	NC_016657
NC_014109.1	NC_016658
NC_012781.1	NC_016659
ABYK01	NC_016761
NC_012491.1	NC_016762
NC_011661.1	NC_016763
NC_011901.1	NC_016764
NC_010545.1	NC_016765
NC_011027.1	NC_016766
NC_011026.1	NC_016767
NC_012034.1	NC_016770
NC_012785.1	NC_016899
NC_013194.1	NC_017087
NC_012985.3	NC_017088
NC_014387.1	NC_017089
NC_010544.1	NC_017090
NC_012881.1	NC_017674
NZ_CP005680.1	NC_017688
ADEK01	NC_017732
NZ_CM000745.1	NC_017864
NZ_CP009781.1	NC_017865
JPPT01	NC_017968
NC_013720.1	NC_017969
NC_011992.1	NC_017971
NC_015578.1	NC_017972
NC_015577.1	NC_017973
NC_013205.1	NC_017974
NC_012522.1	NC_017975
NC_012791.1	NC_017976
AEEL01	NC_017978
NC_011312.1	NC_017980
ABXQ01	NC_017981
NC_011295.1	NC_017983
NC_011297.1	NC_017984
NC_011296.1	NC_017985
ACIS01	NC_018083
NZ_CP009787.1	NC_018084
NC_012962.1	NC_018085
NC_014541.1	NC_018086
NC_014248.1	NC_018087
NC_012559.1	NC_018088
NC_014377.1	NC_018264
ACJM01	NC_018269
NC_013422.1	NC_018270
ACJN02	NC_018271
NC_012917.1	NC_018272
NC_012997.1	NC_018273
NC_022663.1	NC_018274
NC_015714.1	NC_018275
NC_012751.1	NC_018276
NC_013421.1	NC_018277
NC_012912.1	NC_018278
AFSH01	NC_018279
CP001227.1	NC_018280
NC_014098.1	NC_018281
NC_014506.1	NC_018282
ACCW01	NC_018283
ACCX01	NC_018284
ACCY01	NC_018285
NC_013715.1	NC_018452
NC_014106.1	NC_018454
CP001226.1	NC_018831
NC_012225.1	NC_018832
ABYA01	NC_018834
ABYX02	NC_018835
NC_020990.1	NC_018836
CP001733.1	NC_018837
NC_013851.1	NC_018838
NC_014632.1	NC_018839
NC_014964.1	NC_018840
NC_014011.1	NC_018841
NC_017455.1	NC_018842
NC_014166.1	NC_018843
NC_014816.1	NC_018845
ACQT01	NC_018846
NC_014393.1	NC_018847
NC_014364.1	NC_018848
NC_013532.1	NC_018849
NC_014378.1	NC_018850
NC_014962.1	NC_018851
NC_014394.1	NC_018852
NC_014972.1	NC_018853
NZ_CM001376.1	NC_018854
CP002295.1	NC_018855
NC_013119.1	NC_018856
ACFT01	NC_018857
NC_013921.1	NC_018859
NC_013959.1	NC_018860
NC_014410.1	NC_018861
NC_012982.1	NC_018863
NC_012969.1	NC_019398
NC_021172.1	NC_019399
ACFP01	NC_019400
NC_014209.1	NC_019401
NC_014008.1	NC_019402
CU928158.2	NC_019403
NC_022246.1	NC_019404
ACON01	NC_019405
ACVB02	NC_019406
ACXX02	NC_019407
NZ_CP009124.1	NC_019408
ACFA01	NC_019410
NC_014216.1	NC_019411
NC_014153.1	NC_019413
NC_013642.1	NC_019414
NC_013740.1	NC_019416
NC_015514.1	NC_019417
NC_015671.1	NC_019418
NC_015675.1	NC_019419
NC_012691.1	NC_019420
NZ_CM000770.1	NC_019421
NC_017765.1	NC_019422
ACEZ01	NC_019423
ACDC03	NC_019442
NC_012214.1	NC_019443
NC_014306.1	NC_019444
NC_012121.1	NC_019445
NC_012846.1	NC_019446
NC_019552.1	NC_019447
NC_012913.1	NC_019448
NC_015850.1	NC_019449
NC_013960.1	NC_019450
NC_014363.1	NC_019451
NC_014375.1	NC_019452
NC_013894.1	NC_019453
NC_014100.1	NC_019454
ABWL02	NC_019455
ABXI02	NC_019456
ABQC02	NC_019457
NZ_CP007619.1	NC_019485
ACIL03	NC_019486
ACJX02	NC_019487
ACIM02	NC_019488
ACJW02	NC_019489
ACIJ02	NC_019490
ACIP02	NC_019496
NZ_CM000953.1	NC_019500
NC_014644.1	NC_019501
ABVQ01	NC_019502
ABVO01	NC_019503
ACGU01	NC_019504
NC_015975.1	NC_019505
ACKW01	NC_019506
AXVC01	NC_019507
ARMA01	NC_019508
ACIN03	NC_019509
AJVZ01	NC_019510
ARKX01	NC_019511
NC_014370.1	NC_019512
ACNN01	NC_019513
ACLQ01	NC_019514
NC_014643.1	NC_019515
ACCJ01	NC_019516
ABYT01	NC_019517
AKKM01	NC_019518
ABQR01	NC_019519
ACYI01	NC_019520
JGYL01	NC_019521
ACJB01	NC_019522
NZ_CM001774.1	NC_019523
ABXH02	NC_019524
ABYI02	NC_019525
ACBW01	NC_019526
ADFP01	NC_019527
ACEN01	NC_019528
ACRG01	NC_019529
ADBE01	NC_019530
ABZU01	NC_019538
ACVP01	NC_019539
ACLL01	NC_019540
ACGP01	NC_019541
NC_022112.1	NC_019542
ACKO02	NC_019543
ACEO02	NC_019544
NC_016630.1	NC_019545
ACKU01	NC_019548
ACRM01	NC_019549
AZXW01	NC_019550
ATFC01	NC_019704
ACFE01	NC_019705
ABZV01	NC_019706
AUFR01	NC_019707
NC_014246.1	NC_019708
ACSH02	NC_019709
ADNV01	NC_019710
ABYP01	NC_019711
ACCF01	NC_019713
ACFG01	NC_019714
ACFH01	NC_019715
ABXV02	NC_019716
ABWM02	NC_019717
ABWK02	NC_019718
ABWP01	NC_019719
ABWO01	NC_019720
FP929050.1	NC_019721
ACGC01	NC_019722
JNJO01	NC_019723
AGZP01	NC_019724
ABYU02	NC_019725
ACBX02	NC_019726
ACCH01	NC_019767
ACEC01	NC_019768
NC_020555.1	NC_019769
CBUB01	NC_019782
ACFU01	NC_019813
AMZQ01	NC_019909
ACRO01	NC_019910
ACYG01	NC_019911
JRMW01	NC_019912
ACKQ02	NC_019913
ABYQ02	NC_019914
ACDY02	NC_019915
AAXA02	NC_019916
ADGQ01	NC_019917
APQF01	NC_019918
NC_015437.1	NC_019919
ACIK02	NC_019920
NC_020164.1	NC_019921
ACEA01	NC_019922
ACGD01	NC_019923
ACHJ01	NC_019924
ACGE01	NC_019925
NC_012590.1	NC_019926
ADLN01	NC_019927
ACFY01	NC_019928
ABXA01	NC_019929
ABWN01	NC_019930
ACDP02	NC_019931
ACDH02	NC_019932
ACDO01	NC_019933
ACDD01	NC_019934
ACDB02	NC_019935
ACIE02	NC_020077
NZ_CM001149.1	NC_020078
ADNU01	NC_020079
NZ_CM000961.1	NC_020080
ADNY01	NC_020081
ACLN01	NC_020082
NC_014217.1	NC_020083
ACKY01	NC_020158
ACKZ01	NC_020159
ACLA01	NC_020197
NZ_CP007640.1	NC_020198
ACGV01	NC_020199
NZ_CM001024.1	NC_020200
NC_015601.1	NC_020201
ADVL01	NC_020202
ACHA02	NC_020203
ACKS01	NC_020204
ACKT01	NC_020205
ACOA01	NC_020414
NC_013850.1	NC_020416
NC_014168.1	NC_020477
NC_016803.1	NC_020478
NC_014220.1	NC_020479
NC_014759.1	NC_020480
ACNZ01	NC_020481
NC_014218.1	NC_020482
NC_014365.1	NC_020483
NC_014391.1	NC_020484
ACNX01	NC_020486
JNKE01	NC_020488
NC_012704.1	NC_020489
NC_013062.1	NC_020490
NC_014844.1	NC_020835
NC_014831.1	NC_020837
NC_015172.1	NC_020838
NC_014655.1	NC_020839
NC_015702.1	NC_020841
NC_014221.1	NC_020842
NC_014829.1	NC_020843
ACQA01	NC_020844
AKAR01	NC_020845
NC_010572.1	NC_020846
NC_012806.1	NC_020847
NC_014836.1	NC_020848
ACOH01	NC_020849
NC_014664.1	NC_020850
NC_015291.1	NC_020851
ACXU01	NC_020853
ADNT01	NC_020854
AEPD01	NC_020855
NC_014640.1	NC_020856
ACRX01	NC_020857
AECS01	NC_020858
NC_015656.1	NC_020859
FP929036.1	NC_020860
ACRE02	NC_020862
ACRF02	NC_020863
ACRN01	NC_020865
NC_013203.1	NC_020866
FP929051.1	NC_020867
FP929048.1	NC_020868
NC_014041.1	NC_020869
NC_021021.1	NC_020870
FP929033.1	NC_020871
NC_021039.1	NC_020872
NC_021019.1	NC_020873
ACUL02	NC_020874
NC_010321.1	NC_020875
NC_008752.1	NC_020876
NC_004578.1	NC_020877
NC_007626.1	NC_020878
ACPX01	NC_020879
NC_014774.1	NC_020880
ABZR01	NC_020882
NC_005773.3	NC_020883
ACUX02	NC_021061
NC_016603.1	NC_021062
ADNS01	NC_021063
ACUZ02	NC_021067
APON01	NC_021068
APPX01	NC_021070
FP929062.1	NC_021071
NC_014803.1	NC_021072
APQS01	NC_021073
ACVA01	NC_021297
NC_012968.1	NC_021298
NC_015673.1	NC_021299
ACYF01	NC_021300
NC_014828.1	NC_021301
ASXS01	NC_021302
JPKO01	NC_021304
AGYV01	NC_021305
NC_013282.2	NC_021306
ACWF01	NC_021307
NC_015164.1	NC_021308
NC_015681.1	NC_021309
ACZR01	NC_021310
ADBY01	NC_021311
ACYA01	NC_021316
ACYB01	NC_021317
NC_015949.1	NC_021318
NC_014314.1	NC_021319
NC_014761.1	NC_021320
ADOO01	NC_021321
ACTJ01	NC_021322
ACTK01	NC_021323
ACTM01	NC_021324
ACTN01	NC_021325
ACTO01	NC_021326
ACTP02	NC_021327
ACTR01	NC_021328
ACTS01	NC_021329
ADCR01	NC_021330
ACTV01	NC_021331
ACTW01	NC_021332
ACTX01	NC_021334
ACWP01	NC_021335
ACWQ01	NC_021336
AEEG01	NC_021337
NC_014315.1	NC_021338
NC_014392.1	NC_021339
NC_022349.1	NC_021340
NC_017583.1	NC_021342
NC_014207.1	NC_021343
NZ_CP004360.1	NC_021344
NZ_CP009264.1	NC_021346
ACZO01	NC_021347
ADAQ01	NC_021348
NC_016602.1	NC_021349
NC_015312.1	NC_021471
CBQQ01	NC_021529
ARKY01	NC_021530
NC_014652.1	NC_021531
NC_014657.1	NC_021532
NC_014136.1	NC_021533
NC_017301.1	NC_021534
ADFR01	NC_021535
ACZI02	NC_021536
ACZL01	NC_021537
ACZM01	NC_021538
NC_015757.1	NC_021539
NZ_CM001167.1	NC_021540
NC_015660.1	NC_021556
ACZW02	NC_021557
ADAC02	NC_021558
ADAE01	NC_021559
NC_014152.1	NC_021560
NC_015968.1	NC_021561
NC_015275.1	NC_021562
AFJE01	NC_021563
NC_015707.1	NC_021569
NC_014934.1	NC_021772
NC_013520.1	NC_021773
NC_015422.1	NC_021774
NC_008313.1	NC_021775
ADVE02	NC_021776
ACBQ01	NC_021777
AEAD01	NC_021779
NC_009674.1	NC_021780
NC_014923.1	NC_021781
NC_006156.1	NC_021782
NC_007508.1	NC_021783
NZ_CM001022.1	NC_021784
NC_015161.1	NC_021785
NC_014933.1	NC_021787
APQN01	NC_021788
ADCQ01	NC_021789
ADCU02	NC_021790
ADCX01	NC_021791
ADCY02	NC_021792
ADCZ01	NC_021793
ADDA01	NC_021794
NC_018609.1	NC_021795
ADEG01	NC_021796
ADCM01	NC_021797
ADCP02	NC_021798
NC_014734.1	NC_021799
NC_017470.1	NC_021800
NC_014376.1	NC_021801
NC_015722.1	NC_021802
NC_022236.1	NC_021803
NC_015520.1	NC_021804
NC_015958.1	NC_021805
NC_013893.1	NC_021806
ADGP01	NC_021852
NC_014721.1	NC_021853
NC_015389.1	NC_021854
NC_016609.1	NC_021855
CM001047.1	NC_021856
ADMN01	NC_021857
ADDS01	NC_021860
ADDX02	NC_021861
NZ_CM001148.1	NC_021862
NC_015957.1	NC_021863
NC_014654.1	NC_021864
ADGI01	NC_021865
AFPX01	NC_021866
NC_022239.1	NC_021867
NC_016816.1	NC_021868
NC_010118.1	NC_022052
NC_018025.1	NC_022053
APQQ01	NC_022054
AECQ01	NC_022055
NC_015155.1	NC_022056
AECZ01	NC_022057
NC_014958.1	NC_022058
NC_015160.1	NC_022059
NC_014318.1	NC_022060
NC_014762.1	NC_022061
ADGY01	NC_022062
NC_015978.1	NC_022063
NZ_CP010820.1	NC_022065
NZ_CM001403.1	NC_022066
ADHJ01	NC_022067
ADUH01	NC_022068
AEDB02	NC_022069
NC_017576.1	NC_022070
FP929038.1	NC_022071
NC_021030.1	NC_022085
FP929056.1	NC_022086
NC_015977.1	NC_022087
NC_014830.1	NC_022088
NC_014225.1	NC_022090
NC_015672.1	NC_022091
NZ_CM001487.1	NC_022094
NC_014562.1	NC_022096
NZ_CM000920.1	NC_022323
FP929060.1	NC_022324
FP929061.1	NC_022325
NC_014259.1	NC_022328
NC_017506.1	NC_022329
NC_013939.1	NC_022330
NC_014974.1	NC_022331
NC_014355.1	NC_022334
NC_021083.1	NC_022335
JAKV01	NC_022336
NC_014914.1	NC_022337
NC_015732.1	NC_022338
AGIF02	NC_022340
NC_018644.1	NC_022341
ADZZ01	NC_022342
NC_015499.1	NC_022343
AEVP02	NC_022744
NC_015174.1	NC_022746
NC_016582.1	NC_022747
AFLX02	NC_022749
AFJC01	NC_022750
NC_015321.1	NC_022751
NC_015589.1	NC_022752
NC_016631.1	NC_022753
NC_015152.1	NC_022754
AFAK01	NC_022756
NC_017384.1	NC_022757
NC_014935.1	NC_022758
NC_014006.1	NC_022761
AGIG01	NC_022762
AUKF01	NC_022763
ADUI01	NC_022764
ADLJ01	NC_022765
NZ_CP007557.1	NC_022766
ADLL01	NC_022767
AUFU01	NC_022768
AQCF01	NC_022769
ADLF01	NC_022770
ADLE01	NC_022771
ADLD01	NC_022772
ADLB02	NC_022773
ADMG01	NC_022774
ADMD01	NC_022775
ADMC01	NC_022776
ADMB01	NC_022790
JHWT01	NC_022791
ADLV01	NC_022914
ADLT01	NC_022915
ADLS01	NC_022916
NC_015436.1	NC_022917
NC_015318.1	NC_022918
NC_015510.1	NC_022920
AEGW02	NC_022965
ASWN01	NC_022966
NC_013204.1	NC_022967
NC_019908.1	NC_022968
AEVO01	NC_022969
AFBM01	NC_022970
AFBN01	NC_022971
ADVI01	NC_022972
NC_015678.1	NC_022973
AFBP01	NC_022974
AFBQ01	NC_022975
AFFY01	NC_022976
AFBR01	NC_022977
AEVN01	NC_022979
ADLW01	NC_022980
ADMS01	NC_022981
AEUW02	NC_022982
AEUX02	NC_022983
ADVR01	NC_022984
NC_014963.1	NC_022985
NC_017934.1	NC_022986
NC_015703.1	NC_022987
AEDD01	NC_022988
NC_018142.1	NC_022989
NC_015311.1	NC_023005
NC_014758.1	NC_023006
NC_015588.1	NC_023007
NC_015556.1	NC_023009
NC_015177.1	NC_023498
NC_014926.1	NC_023499
AGEL01	NC_023500
AEKN01	NC_023501
AEUZ02	NC_023502
AFXP01	NC_023503
AFZE01	NC_023548
AFZF02	NC_023549
AFZG01	NC_023550
CAKP01	NC_023551
NC_015593.1	NC_023552
NC_014909.2	NC_023553
NC_015846.1	NC_023554
NC_015859.1	NC_023555
NC_015555.1	NC_023556
NC_015183.1	NC_023557
NC_015964.1	NC_023558
AEES01	NC_023559
AEEH01	NC_023560
AEEI01	NC_023561
NC_015144.1	NC_023562
NC_016818.1	NC_023563
NZ_CP009354.1	NC_023564
AENY02	NC_023565
NC_015385.1	NC_023566
NC_015387.1	NC_023567
AEDO01	NC_023568
NC_015167.1	NC_023569
AFBB01	NC_023570
NC_015278.1	NC_023571
AMEX01	NC_023572
NC_014497.1	NC_023573
AFWE01	NC_023574
AFWF01	NC_023575
AEVD01	NC_023576
NC_013162.1	NC_023577
AEPE02	NC_023578
NC_015185.1	NC_023579
AEGL01	NC_023580
NC_015501.1	NC_023581
BABV01	NC_023582
NC_015565.1	NC_023583
AEUY02	NC_023584
NC_012587.1	NC_023585
NC_013511.1	NC_023586
NC_015633.1	NC_023587
AGWI01	NC_023588
AGWK01	NC_023589
AGWY01	NC_023590
AGEF01	NC_023591
AGEG01	NC_023592
AGEI01	NC_023593
AGEE01	NC_023594
NC_013171.1	NC_023595
AGZX01	NC_023597
AGZU01	NC_023599
AEWI01	NC_023600
NC_014624.2	NC_023601
NC_015945.1	NC_023602
NC_014532.1	NC_023603
NC_015558.1	NC_023604
AFHS01	NC_023605
AEUU02	NC_023606
AEUV02	NC_023607
NC_015276.1	NC_023608
NZ_CM001475.1	NC_023609
AEIG01	NC_023610
JMEA01	NC_023612
NC_015559.1	NC_023614
NC_015573.1	NC_023686
NC_014924.1	NC_023687
NC_015581.1	NC_023688
ARBD01	NC_023689
NC_014366.1	NC_023690
NC_016629.1	NC_023691
NC_013501.1	NC_023692
AEQP01	NC_023693
AEQN01	NC_023694
AQHZ01	NC_023695
AEPS01	NC_023696
AFHQ01	NC_023697
AFHR01	NC_023698
AEPV01	NC_023699
AFBC01	NC_023700
AEWV01	NC_023701
AFAY01	NC_023702
AEWX01	NC_023703
AEVF01	NC_023704
AEQO01	NC_023705
JEMG01	NC_023706
AGWP01	NC_023707
AEVG01	NC_023708
AEPW01	NC_023709
AEQR01	NC_023710
AEVC01	NC_023711
NC_015875.1	NC_023712
NC_014550.1	NC_023713
NC_015388.1	NC_023714
NC_014720.1	NC_023715
NC_015736.1	NC_023716
AEVI01	NC_023717
NC_015735.1	NC_023718
NC_015500.1	NC_023719
NC_015572.1	NC_023720
AEIZ01	NC_023721
AENN01	NC_023722
AENP01	NC_023723
AEKL01	NC_023724
NC_022546.1	NC_023725
AEKG01	NC_023726
AEKT01	NC_023727
NZ_CM001488.1	NC_023728
NC_021184.1	NC_023729
AEQV01	NC_023730
NC_019897.1	NC_023731
NC_019960.1	NC_023732
AEQW01	NC_023733
AEMJ01	NC_023734
AENJ01	NC_023735
NC_014722.1	NC_023736
AEOF01	NC_023737
AEOP01	NC_023738
ACTI01	NC_023739
CACP01	NC_023740
CACK01	NC_023741
NC_013521.1	NC_023742
NC_013441.1	NC_023743
NC_013440.1	NC_023744
NC_013512.1	NC_023746
NC_013515.1	NC_023747
NC_013517.1	NC_023748
NC_013510.1	NC_023856
NC_013522.1	NC_023859
NC_013530.1	NC_023862
NC_013523.1	NC_023863
NC_013525.1	NC_023865
NC_013595.1	NC_024121
NC_014960.1	NC_024122
NC_014319.1	NC_024123
NC_013730.1	NC_024124
NC_013729.1	NC_024125
NC_013739.1	NC_024134
NC_013947.1	NC_024135
NC_014148.1	NC_024136
NC_014150.1	NC_024137
NC_014151.1	NC_024138
NC_014158.1	NC_024139
NC_014165.1	NC_024140
NC_014210.1	NC_024141
NC_014212.1	NC_024142
ABTR02	NC_024143
NC_013172.1	NC_024144
NC_013093.1	NC_024145
NC_013170.1	NC_024146
NC_012669.1	NC_024147
NC_013037.1	NC_024148
NC_013165.1	NC_024149
NC_013174.1	NC_024203
NC_013159.1	NC_024204
NC_013757.1	NC_024205
NC_013943.1	NC_024207
NC_013169.1	NC_024208
NC_013131.1	NC_024209
NC_013216.1	NC_024210
NC_013061.1	NC_024211
NC_013132.1	NC_024212
NC_013223.1	NC_024213
NC_013166.1	NC_024214
NC_013192.1	NC_024215
NC_013124.1	NC_024216
NC_013173.1	NC_024217
NC_013235.1	NC_024330
JDVA01	NC_024354
NC_015663.1	NC_024355
NC_018017.1	NC_024356
AEOT01	NC_024357
NC_014810.2	NC_024358
AEPR01	NC_024359
AEVK01	NC_024360
NC_014925.1	NC_024361
NZ_CP007032.1	NC_024362
AEUP01	NC_024363
AELK01	NC_024364
AEPB01	NC_024365
NC_015942.1	NC_024366
NC_019903.1	NC_024367
NC_018068.1	NC_024368
AEQX01	NC_024369
AEUD01	NC_024370
NC_017317.1	NC_024371
AEXB01	NC_024375
NZ_CP007031.1	NC_024378
NC_014932.1	NC_024379
CBMK01	NC_024380
NC_015434.1	NC_024381
AERW01	NC_024383
AEVS01	NC_024384
AEVT01	NC_024385
NC_016599.1	NC_024386
AFWT01	NC_024387
BAEK01	NC_024388
NC_015408.1	NC_024389
AEWH01	NC_024390
AFWV01	NC_024391
AEWF01	NC_024392
AFCE01	NC_024711
AEQY01	NC_024782
NC_015125.1	NC_024783
AEWJ01	NC_024784
ATXY01	NC_024785
NC_015564.1	NC_024786
AEYX01	NC_024787
AFAL01	NC_024788
NC_015424.1	NC_024789
NZ_CM001484.1	NC_024790
NC_018014.1	NC_024791
NC_015259.1	NC_024792
NC_015186.1	NC_024793
AFAJ01	NC_024794
NC_016935.1	NC_025115
NC_015381.1	NC_025213
ARWH01	NC_025375
AFQE01	NC_025414
AFPY01	NC_025415
AFPZ01	NC_025416
AGXS01	NC_025417
JAFH01	NC_025418
AFBG01	NC_025419
AQHX01	NC_025420
AEYC01	NC_025421
AOHC02	NC_025422
JFBT01	NC_025423
AFIG01	NC_025424
AZYF01	NC_025425
NZ_CM001195.1	NC_025426
AZXR01	NC_025427
AFQN01	NC_025428
ASSQ01	NC_025429
AHOO02	NC_025430
AKWY02	NC_025431
NC_019904.1	NC_025433
NC_015379.1	NC_025434
BACE01	NC_025436
AGEK01	NC_025437
NC_015460.1	NC_025438
NZ_CM001377.1	NC_025439
NC_018643.1	NC_025440
AZYG01	NC_025441
AFHW01	NC_025442
NZ_CM001633.1	NC_025443
AFIB01	NC_025444
AFIA01	NC_025445
AFHZ01	NC_025446
AFHY01	NC_025447
NC_017028.1	NC_025448
AFGF01	NC_025449
AULQ01	NC_025450
NC_015516.1	NC_025451
NC_015635.1	NC_025452
AFVJ01	NC_025453
AFUV01	NC_025454
NZ_CP003915.1	NC_025455
JONY01	NC_025456
AFNU02	NC_025457
AFNV02	NC_025458
AFAM01	NC_025459
NC_015866.1	NC_025460
AFIZ01	NC_025461
NC_015602.1	NC_025462
NC_015600.1	NC_025463
AFRP01	NC_025464
AFVW02	NC_025465
NZ_CP007806.1	NC_025466
ATWM01	NC_025467
NC_017243.1	NC_025470
NC_015759.1	NC_025471
AFXZ01	NC_025822
AFPL01	NC_025824
AFPK01	NC_025829
NC_015674.1	NC_025830
AFWQ01	NC_026010
NC_015758.1	NC_026013
ASJI01	NC_026014
NC_015914.1	NC_026016
AFVQ01	NC_026017
AGBD01	NC_026582
AGAU01	NC_026583
NC_015921.1	NC_026584
AICX01	NC_026585
NC_015848.1	NC_026586
AGBF01	NC_026587
AFZB01	NC_026588
AFOC01	NC_026589
AGBX01	NC_026590
NC_018515.1	NC_026591
NC_017095.1	NC_026593
NC_016010.1	NC_026594
CAOG01	NC_026595
AYXO01	NC_026596
JOKM01	NC_026597
AFBX01	NC_026598
NC_018513.1	NC_026599
AGDG01	NC_026600
AGDB01	NC_026601
NC_016052.1	NC_026602
AORK01	NC_026603
NC_018081.1	NC_026604
NZ_CP007739.1	NC_026605
NC_018016.1	NC_026606
NZ_CP009706.1	NC_026607
NC_017068.1	NC_026608
NC_018750.1	NC_026609
NZ_CM001538.1	NC_026610
BACS01	NC_026611
AGBU01	NC_026612
JANE01	NC_026613
JPIX01	NC_026665
NC_017094.1	NC_026923
JQJX01	NC_026924
NC_022041.1	NC_026926
NC_018024.1	NC_026927
AGSB02	NC_026928
NC_017770.1	NC_027298
NC_016940.1	NC_027353
NZ_CP007035.1	NC_027368
NC_019793.1	NC_027981
AGFF01	NC_027996
NC_016024.1	NC_027997
NC_016001.1	NC_028256
NC_019892.1	NC_028268
JANK01	NC_028764
AGRW01	NC_028787
NC_016041.1	NC_028838
AGWZ01	NC_028883
AGXA01	NC_028905
NC_016043.1	NC_028938
NC_016026.1	NC_028951
AGFU01	NC_028958
CP004345.1	NC_028959
AGAY01	NC_028996
AGDC01	NC_029048
AGDE01	NG_041717
AGBB01	NG_041718
NC_021064.1
AFOH01
AGFP01
CADR01
CADT01
CAFB01
JMLC01
NC_018012.1
AGFD01
AGAZ01
NZ_CP007030.1
NZ_CP007029.1
NC_012793.1
NZ_CM001904.1
NC_017860.1
NC_016610.1
NC_021182.1
ALJK01
AWNK01
NZ_CP008796.1
NZ_HG810405.1
AGXC01
NC_016617.1
AUAU01
ATUH01
NZ_LN681225.1
NC_020059.1
JOCK01
JAOI01
NC_016639.1
NZ_CP007208.1
AIDX01
ALPT02
CAQJ01
AMZJ01
ATDT01
AJXG01
NZ_LK391695.1
NC_016077.1
AGBZ02
NC_020156.1
NC_016148.1
AORC01
NZ_CP006568.1
AVFW01
NC_017910.1
AMEZ01
NC_016616.1
NZ_CP007514.1
NC_019695.1
NC_018645.1
NC_016050.1
ARVU01
AMEY01
NC_019778.1
JXYQ01
NC_018011.1
AKBP01
AUBN01
JONS01
AKBQ01
AWSJ01
NC_021885.1
AXBR01
AMBZ01
NC_018612.1
NZ_CP003811.1
NZ_CP009159.1
AEJB01
AEJC01
NC_018704.1
NC_016605.1
NZ_CP003984.1
NC_017096.1
NC_016048.1
AGCK01
JMCG01
NC_019771.1
AXBP01
AUCC01
ADHD01
AVDV01
AOMT01
NC_017790.1
NC_018013.1
NC_019978.1
NC_019973.1
NZ_CP006581.1
NZ_AP010872.1
NZ_CP007154.1
AFCG01
AGCM01
NC_016633.1
AJXQ01
NC_016622.1
AZAO01
AEEC02
NZ_CM002307.1
CARA01
AHKR01
JFBR01
NC_018010.1
NC_017668.1
AZYH01
NC_018020.1
AJUL01
AGRL01
AGWL01
NZ_CP008802.1
AGYA01
AGZE01
AGZI01
AHAE01
AGIP01
NZ_CM001402.1
AGJJ02
NC_017098.1
JATQ01
ATBP01
NC_018027.1
CACR01
CCNS01
JDFF01
AUTU01
ARDS01
AFXB01
AJUC01
JMPJ01
JMPM01
AEUN01
NC_016604.1
AGCL01
NC_016109.1
NZ_CM001437.1
CAVN01
AGIT02
AHPK01
AGWC01
NC_017464.1
NZ_CM001440.1
NZ_CM001439.1
AHMA01
AJUE01
AICV01
ALVP01
APQA01
NC_018748.1
AHKT01
NZ_CM001441.1
NC_018691.1
NC_020291.1
JQMJ01
AWEZ01
AJUG01
AFZZ01
NC_017586.1
NC_016894.1
NC_019940.1
ALWJ01
JMTB01
AUQW01
JMPL01
NC_016584.1
NZ_CP007033.1
JOKG01
AQTV01
AQPC01
APGO01
AICY01
NZ_HG938353.1
NZ_CP007770.1
JHZL01
JHQP01
JMTI01
JHQQ01
AJWB01
AMEM01
ASPI01
ASPJ01
AQTZ01
AHYU01
NZ_CP007774.1
NZ_CM001514.1
NC_023150.1
JMPP01
AUUA01
JPRU01
AOEX01
NC_016510.2
NZ_CM001398.1
APJK01
NC_016147.2
BACQ01
BACR01
JMEX01
CP003731.1
NC_018649.1
BACN01
BACO01
APIZ01
CAFE01
AGEZ01
AGSO01
NC_022878.1
AGQZ01
BAEE01
CCMN01
CANP01
AUJL01
ASSZ01
AFSI01
NC_021900.1
AICW01
AGVE01
NC_018673.1
BAED01
AGCW01
NC_016627.1
NC_016078.1
AGSN01
AHKF01
ATYA01
BAJN01
AHHE02
CCBF01
AMSA01
NC_018665.1
NC_018149.1
NC_019425.2
AGFR01
AGQV01
AMGC01
ACHS01
ARAW01
JOJP01
NC_017025.1
NZ_CM001373.1
AHOC02
NC_023135.1
AQZB01
AHMM02
AHMO02
AHMP02
AHMT02
AGUF01
AGTR01
JPHE01
ALWK01
ATYB01
NZ_CP007028.1
NC_016930.1
NC_017044.1
AGFX01
NC_023029.1
NC_017058.1
NC_017043.1
AJMU01
AJSX01
AILU01
NC_017042.1
AILV01
AILW01
AILY01
NC_020301.1
NZ_CM001557.1
AIMD01
AIME01
NC_020300.1
NZ_CM001844.1
AIMA01
AIMG01
CP003184.1
AHAM01
AXBK01
NZ_CP007051.1
NZ_CP004350.1
NC_017956.1
JFBU01
NC_016638.1
AHBD01
NC_016906.1
AHIR01
ATTB01
AGVW02
AHBF01
AZOF01
ATTD01
AQUA01
AQZH01
AQZI01
AQZJ01
AQZK01
AQZL01
AQUB01
AZHQ01
AJLS01
NZ_CP007547.1
AGVX02
NZ_CP008747.1
AUAW01
AZHR01
ARPB01
ARPC01
NC_018868.3
ATTC01
CAGB01
AJFQ01
ARPD01
AHBY02
AHBZ02
AHCD02
AHCE02
AHCF02
AHIP01
BBMW01
BBMX01
BAFF01
BBMZ01
AXBI01
ATYG01
AHGS01
NZ_CP009291.1
JFYR01
AHCB02
ARMY01
NC_023075.1
AXBH01
AZAK01
AXBG01
NZ_CM002803.1
BAEH01
BAEG01
AUBM01
AUFQ01
AKIO01
AXZG01
ATFD01
ATBY01
AFPB01
AZOB01
BAFB01
BAHC01
CAGH01
FO082843.1
AHJE01
NC_018664.1
AHJU01
CAPN01
AHTH01
CALC01
ALJL01
ALNK01
AHBJ01
BAKN01
AGEY01
AJRZ01
NC_017964.1
AQZN01
JROC01
AMSD01
ALAN01
JJRY01
AHKH01
CP003732.1
NC_016641.1
CAEM01
NZ_CP009238.1
BAHB01
ARBH01
JNXA01
CAGS01
AQZO01
AHYZ01
ATTE01
NC_020135.1
AJJM01
AHZX01
NC_015873.1
BAFE01
NC_016749.1
AXBF01
NC_018681.1
AGRJ01
ARPK01
AZNU01
ARPG01
NC_018267.1
AQUE01
AQUF01
AQUG01
CAGZ01
CAHA01
AQUH01
AQUI01
BAFC01
NC_017075.1
CAGK02
CAGL02
CAGM02
CAGN02
CAGO02
AZXQ01
AJTV01
AXBE01
AHPL01
AQZT01
CAIA01
CAIB01
NZ_CM001773.1
AKKL01
AHYV01
AHYW01
ARVW01
NZ_CP009110.1
AICN01
JAFE01
NC_017030.1
ATYJ01
NC_017079.1
NC_016593.1
AJFD01
AJUN01
CANI01
AEYE02
AEZC01
NC_018002.1
ANNX01
AJUM01
NZ_CP007053.1
NZ_CM001486.1
ATXZ01
NC_017033.1
JFBS01
AGYT01
NC_018065.1
NZ_CP007139.1
AYSJ01
[truncated: 29,987 more rows]

## Sheet: after May 2015
Bacteria NCBI accession	Virus NCBI accession
CP027770.1	NC_034248
CP027704.1	NC_031045
CP027105.1	NC_031021
CP027543.1	NC_031909
CP027540.1	NC_031934
CP021256.1	NC_031928
CP021260.1	NC_031943
CP021261.1	NC_031911
CP021263.1	NC_031926
CP021264.1	NC_031914
CP021265.1	NC_031932
CP021269.1	NC_031945
CP021257.1	NC_031931
CP021258.1	NC_031912
CP021259.1	NC_031904
CP021262.1	NC_031921
CP021266.1	NC_031938
CP021267.1	NC_031905
CP021268.1	NC_031919
CP021272.1	NC_031936
CP021277.1	NC_031917
CP021274.1	NC_031908
CP021279.1	NC_031902
CP021281.1	NC_031946
CP021283.1	NC_031930
CP021286.1	NC_031933
CP021270.1	NC_031940
CP027226.1	NC_031918
CP027227.1	NC_031925
NZ_CP027231.1/CP027231.1	NC_031939
NZ_CP027234.1/CP027234.1	NC_031924
NZ_CP027235.1/CP027235.1	NC_031920
NZ_CP027242.1/CP027242.1	NC_031910
CP027228.1	NC_031901
NZ_CP027241.1/CP027241.1	NC_031941
NZ_CP027238.1/CP027238.1	NC_031913
NZ_CP027236.1/CP027236.1	NC_031942
CP022508.1	NC_031929
NZ_CP027232.1/CP027232.1	NC_031923
NZ_CP027229.1/CP027229.1	NC_031915
CP022513.1	NC_031907
CP022505.1	NC_031903
CP022512.1	NC_031906
CP027250.1	NC_031900
CP027206.1	NC_031927
CP027208.1	NC_031922
CP022514.1	NC_031944
CP027254.1	NC_031935
CP027209.1	NC_031280
CP027210.1	NC_031252
CP027211.1	NC_031231
CP027212.1	NC_031254
CP027213.1	NC_031224
CP027215.1	NC_031245
CP027216.1	NC_031264
CP027217.1	NC_031235
CP027207.1	NC_031242
CP027214.1	NC_031260
CP027533.1	NC_031226
CP027539.1	NC_031247
CP024867.1	NC_031234
CP027528.1	NC_031265
CP027246.1	NC_031229
CP027538.1	NC_031233
CP026660.1	NC_031267
CP027255.1	NC_031237
CP027534.1	NC_031255
CP027126.1	NC_031251
CP027526.1	NC_031249
CP027527.1	NC_031239
CP023477.1	NC_031269
CP023665.1	NC_031230
CP023666.1	NC_031246
CP019981.1	NC_031277
CP019980.1	NC_031279
CP020018.1	NC_031253
CP020089.1	NC_031262
CP020023.1	NC_031238
CP019681.1	NC_031263
CP027224.1	NC_031256
CP027287.1	NC_031257
CP027035.1	NC_031281
NZ_CP020006.1/	NC_031266
NZ_CP020007.1/	NC_031261
NZ_CP020008.1/	NC_031243
NZ_CP020009.1/	NC_031274
NZ_CP020010.1/	NC_031258
NZ_CP020011.1/	NC_031271
NZ_CP020012.1/	NC_031228
NZ_CP020013.1/	NC_031250
NZ_CP020014.1/	NC_031241
CP027190.1	NC_031098
CP027194.1	NC_031117
CP027189.1	NC_031086
CP027188.1	NC_031039
CP027142.1	NC_031121
CP027177.1	NC_031024
CP026610.1	NC_031015
CP027165.1	NC_031006
CP027171.1	NC_031056
CP027172.1	NC_031054
CP027174.1	NC_031012
CP027169.1	NC_031070
CP027166.1	NC_031037
CP021325.1	NC_031049
CP027146.1	NC_031055
CP027160.1	NC_031100
CP027140.1	NC_031027
CP027134.1	NC_031034
NZ_CP023272.1/CP023272.1	NC_031032
NZ_CP023270.1/CP023270.1	NC_031116
NZ_CP019871.1/CP019871.1	NC_031066
NZ_CP023271.1/CP023271.1	NC_031092
NZ_CP023268.1/CP023268.1	NC_031123
NZ_CP026673.1/CP026673.1	NC_031018
NZ_CP023269.1/CP023269.1	NC_031057
NZ_CP020025.1/CP020025.1	NC_031048
CP025211.1	NC_031077
NZ_CP027062.1/CP027062.1	NC_031019
NZ_CP016490.1/CP016490.1	NC_031050
NZ_CP023019.1/CP023019.1	NC_031051
NZ_CP019305.1/CP019305.1	NC_031107
NZ_CP016608.1/CP016608.1	NC_031120
NZ_CP016610.1/CP016610.1	NC_031126
NZ_CP019160.1/CP019160.1	NC_031007
CP027205.1	NC_031127
CP026847.1	NC_031010
CP026924.1	NC_031043
CP026681.1	NC_031062
CP026692.1	NC_031114
CP026616.1	NC_031081
CP014014.1	NC_031113
CP026824.1	NC_031047
CP026827.1	NC_031030
CP027022.1	NC_031103
CP026795.1	NC_031082
NZ_CP024073.1/CP024073.1	NC_031074
NZ_CP024077.1/CP024077.1	NC_031072
NZ_CP024075.1/CP024075.1	NC_031118
NZ_CP024072.1/CP024072.1	NC_031029
NZ_CP024071.1/CP024071.1	NC_031122
CP026788.1	NC_031028
CP027027.1	NC_031099
NZ_CP027064.1/CP027064.1	NC_031060
CP026807.1	NC_031109
CP026805.1	NC_031004
CP026815.1	NC_031061
CP026819.1	NC_031112
CP026823.1	NC_031031
CP026774.1	NC_031001
CP026777.1	NC_031052
CP026878.1	NC_031097
CP026780.1	NC_031025
CP026782.1	NC_031095
CP026786.1	NC_031053
CP026784.1	NC_031087
CP026825.1	NC_031036
CP026828.1	NC_031125
CP026831.1	NC_031013
CP026832.1	NC_031040
CP026834.1	NC_031017
CP026839.1	NC_031064
CP026840.1	NC_031071
CP026842.1	NC_031009
CP026731.1	NC_031075
CP026762.1	NC_031002
CP026810.1	NC_031044
CP026766.1	NC_031016
CP026846.1	NC_031020
CP026814.1	NC_031115
CP026877.1	NC_031124
CP026836.1	NC_031035
CP026797.1	NC_031111
CP026845.1	NC_031067
CP026803.1	NC_031041
CP026765.1	NC_031102
CP026811.1	NC_031080
CP026768.1	NC_031068
CP026776.1	NC_031096
CP026792.1	NC_031084
CP026793.1	NC_031119
CP026799.1	NC_031003
NZ_CP027068.1/CP027068.1	NC_031076
CP026802.1	NC_031108
NZ_CP025034.1/CP025034.1	NC_031005
NZ_CP014134.1/CP014134.1	NC_031014
NZ_CP024620.1/CP024620.1	NC_031091
CP026746.1	NC_031058
NZ_CP014033.1/CP014033.1	NC_031063
CP014061.1	NC_031110
NZ_CP025031.1/CP025031.1	NC_031073
CP026652.1	NC_031104
CP026647.1	NC_031059
NZ_LT985476.1/LT985476.1	NC_031042
NZ_LT985475.1/LT985475.1	NC_031129
NZ_LT985474.1/LT985474.1	NC_031026
CP026923.1	NC_031128
CP019062.1	NC_031065
NZ_CP014094.1/CP014094.1	NC_031085
NZ_LT985188.1/LT985188.1	NC_030953
NZ_CP027001.1/CP027001.1	NC_031011
CP014025.1	NC_031022
CP014019.1	NC_031090
NZ_CP014036.1/CP014036.1	NC_031046
NZ_CP014071.1/CP014071.1	NC_031008
CP014018.1	NC_031069
NZ_CP014132.1/CP014132.1	NC_031094
NZ_CP014053.1/CP014053.1	NC_031023
NZ_CP014040.1/CP014040.1	NC_031078
NZ_CP014045.1/CP014045.1	NC_031101
CP014020.1	NC_030945
CP014021.1	NC_030920
NZ_CP026850.1/CP026850.1	NC_030903
CP026880.1	NC_030925
CP026881.1	NC_030904
CP014123.1	NC_030950
CP014111.1	NC_030947
CP026747.1	NC_030949
CP026756.1	NC_030951
CP026744.1	NC_030936
CP026743.1	NC_030943
CP026761.1	NC_030930
CP026750.1	NC_030942
CP026751.1	NC_030901
CP026755.1	NC_030941
CP026697.1	NC_030944
CP026704.1	NC_030902
CP026709.1	NC_030939
CP026715.1	NC_030907
CP026702.1	NC_030906
CP026719.1	NC_030935
CP026707.1	NC_030932
CP026711.1	NC_030914
CP026700.1	NC_030912
CP026723.1	NC_030924
CP026680.1	NC_030917
LT906621.1	NC_030915
CP026677.1	NC_030927
CP026674.1	NC_030921
CP026676.1	NC_030911
CP026675.1	NC_030913
CP026670.1	NC_030905
NZ_CP026975.1/CP026975.1	NC_030929
CP026649.1	NC_030908
NZ_CP026964.1/CP026964.1	NC_030918
NZ_CP026962.1/CP026962.1	NC_030910
NZ_CP026961.1/CP026961.1	NC_030923
CP026960.1	NC_030909
NZ_CP026957.1/CP026957.1	NC_030931
NZ_CP026953.1/CP026953.1	NC_030940
NZ_CP026968.1/CP026968.1	NC_030934
NZ_CP026958.1/CP026958.1	NC_030948
NZ_CP026976.1/CP026976.1	NC_030919
CP026613.1	NC_030933
CP026615.1	NC_030946
CP026614.1	NC_030916
CP026609.1	NC_030695
CP026612.1	NC_030694
CP026606.1	NC_030696
CP025509.1	NC_030698
CP026592.1	NC_030652
CP026591.1	NC_030472
CP026581.1	NC_030458
CP026593.1	NC_030476
CP026594.1	NC_031937
CP026595.1	NC_029075
CP026596.1	NC_029106
CP026597.1	NC_029069
CP026598.1	NC_029121
CP026599.1	NC_029104
CP026533.1	NC_029092
CP026586.1	NC_029102
CP026569.1	NC_029078
CP026580.1	NC_029091
CP026571.1	NC_029073
CP026544.1	NC_029060
NZ_CP024715.1/CP024715.1	NC_029074
NZ_CP026381.1/CP026381.1	NC_029099
CP014119.1	NC_029058
CP024311.1	NC_029068
NZ_CP018049.1/CP018049.1	NC_029118
NZ_CP025011.1/CP025011.1	NC_029079
NZ_CP026516.1/CP026516.1	NC_029059
CP026231.1	NC_029093
CP026216.1	NC_029077
CP026228.1	NC_029084
CP026217.1	NC_029081
NZ_CP026514.1/CP026514.1	NC_029094
NZ_CP026332.1/CP026332.1	NC_029100
NZ_CP026524.1/CP026524.1	NC_029066
NZ_CP026585.1/CP026585.1	NC_029083
NZ_CP026515.1/CP026515.1	NC_029101
NZ_CP026562.1/CP026562.1	NC_029107
NZ_CP026558.1/CP026558.1	NC_029097
NZ_CP026374.1/CP026374.1	NC_029061
NZ_CP026500.1/CP026500.1	NC_029072
NZ_CP026499.1/CP026499.1	NC_029071
NZ_CP026473.1/CP026473.1	NC_029120
NZ_CP026377.1/CP026377.1	NC_029080
NZ_CP026378.1/CP026378.1	NC_029119
CP026387.1	NC_029098
CP026420.1	NC_029067
CP026412.1	NC_029057
CP026406.1	NC_029050
CP026383.1	NC_029046
CP026386.1	NC_029047
CP026392.1	NC_029045
CP026399.1	NC_029044
NZ_CP026491.1/CP026491.1	NC_029043
CP026379.1	NC_029042
CP012673.1	NC_024206
CP024307.1	NC_024329
CP012389.1	NC_028908
NZ_CP026568.1/CP026568.1	NC_028987
CP018883.1	NC_029033
CP018885.1	NC_028834
NZ_CP025536.1/CP025536.1	NC_028768
NZ_CP025839.1/CP025839.1	NC_028848
CP018907.1	NC_028855
CP020656.1	NC_028995
NZ_CP025318.1/CP025318.1	NC_028887
NZ_CP026346.1/CP026346.1	NC_028944
NZ_CP026348.1/CP026348.1	NC_028982
NZ_CP026349.1/CP026349.1	NC_028926
NZ_CP026354.1/CP026354.1	NC_028782
NZ_CP026355.1/CP026355.1	NC_028983
NZ_CP026359.1/CP026359.1	NC_028856
NZ_CP026343.1/CP026343.1	NC_028777
NZ_CP026342.1/CP026342.1	NC_028890
NZ_CP026345.1/CP026345.1	NC_028789
NZ_CP026351.1/CP026351.1	NC_028886
NZ_CP026356.1/CP026356.1	NC_029008
NZ_CP026360.1/CP026360.1	NC_028748
NZ_CP026344.1/CP026344.1	NC_029024
NZ_CP026347.1/CP026347.1	NC_028841
NZ_CP026350.1/CP026350.1	NC_029029
NZ_CP026352.1/CP026352.1	NC_028805
NZ_CP026353.1/CP026353.1	NC_028969
NZ_CP026357.1/CP026357.1	NC_028749
NZ_CP026358.1/CP026358.1	NC_029013
NZ_CP026361.1/CP026361.1	NC_028755
NZ_CP026341.1/CP026341.1	NC_028857
NZ_CP025012.1/CP025012.1	NC_028880
NZ_CP026327.1/CP026327.1	NC_029006
CP026309.1	NC_028991
NZ_CP024809.1/CP024809.1	NC_029004
NZ_CP025396.1/CP025396.1	NC_029022
CP026315.1	NC_028773
CP026321.1	NC_028795
CP026269.1	NC_028772
CP026285.1	NC_029021
CP026275.1	NC_029028
NZ_CP025991.1/CP025991.1	NC_028997
NZ_CP026501.1/CP026501.1	NC_028881
CP026325.1	NC_029009
CP026323.1	NC_029026
CP026326.1	NC_028826
CP026324.1	NC_028990
NZ_CP025963.1/CP025963.1	NC_029016
CP026124.1	NC_028903
CP026111.1	NC_028776
CP026105.1	NC_028872
CP026167.1	NC_029023
CP026192.1	NC_028822
CP026193.1	NC_028863
CP026197.1	NC_028847
NZ_CP024014.1/CP024014.1	NC_028808
NZ_CP026094.1/CP026094.1	NC_028935
CP026235.1	NC_028896
CP026238.1	NC_028943
CP026101.1	NC_028825
CP026122.1	NC_028894
CP026222.1	NC_028925
CP026226.1	NC_028957
CP019899.1	NC_028902
CP026125.1	NC_028993
CP026177.1	NC_028994
CP026178.1	NC_028972
CP026202.1	NC_028786
CP026199.1	NC_028800
CP026328.1	NC_028760
CP026085.1	NC_028750
CP026026.1	NC_028774
CP026027.1	NC_028816
CP026028.1	NC_028870
CP026007.1	NC_028888
CP021850.1	NC_028835
CP023278.1	NC_028830
CP025990.1	NC_028911
CP018629.1	NC_028783
CP025959.1	NC_028900
CP024084.1	NC_028871
CP025317.1	NC_028929
CP025743.1	NC_028766
NZ_CP025985.1/CP025985.1	NC_028898
CP025680.1	NC_028956
CP026005.1	NC_028853
NZ_CP025500.1/CP025500.1	NC_029002
CP025988.1	NC_028920
NZ_CP025950.1/CP025950.1	NC_028986
NZ_CP025753.1/CP025753.1	NC_029018
CP025938.1	NC_028878
CP025943.1	NC_028876
NZ_CP025957.1/CP025957.1	NC_028804
CP025939.1	NC_028823
CP025941.1	NC_028968
CP025951.1	NC_028747
CP024847.1	NC_028922
CP025931.1	NC_028842
CP025930.1	NC_028779
CP025932.1	NC_028897
CP025936.1	NC_028979
CP011245.1	NC_028946
CP012135.1	NC_028936
CP013867.1	NC_028852
NZ_CP016887.1/CP016887.1	NC_028861
CP019869.1	NC_028889
CP022361.1	NC_028869
CP026055.1	NC_028907
CP026047.1	NC_028792
CP026056.1	NC_028947
NZ_CP026046.1/CP026046.1	NC_028877
NZ_CP026050.1/CP026050.1	NC_028923
NZ_CP026062.1/CP026062.1	NC_028843
NZ_CP026045.1/CP026045.1	NC_028849
CP026059.1	NC_028791
NZ_CP025933.1/CP025933.1	NC_028798
NZ_CP010696.1/CP010696.1	NC_028953
NZ_CP010656.1/CP010656.1	NC_028759
NZ_CP026051.1/CP026051.1	NC_028978
CP026041.1	NC_028785
NZ_CP026044.1/CP026044.1	NC_028928
NZ_CP010715.1/CP010715.1	NC_028815
NZ_CP010735.1/CP010735.1	NC_028803
NZ_CP010629.1/CP010629.1	NC_028832
NZ_CP010689.1/CP010689.1	NC_028937
NZ_CP010623.1/CP010623.1	NC_028874
NZ_CP010668.1/CP010668.1	NC_028844
NZ_CP010610.1/CP010610.1	NC_028796
NZ_CP010661.1/CP010661.1	NC_028942
NZ_CP010705.1/CP010705.1	NC_028965
NZ_CP010725.1/CP010725.1	NC_028794
NZ_CP010741.1/CP010741.1	NC_028961
NZ_CP010650.1/CP010650.1	NC_028751
NZ_CP010617.1/CP010617.1	NC_028810
NZ_CP010599.1/CP010599.1	NC_028813
CP026043.1	NC_028932
NZ_CP026076.1/CP026076.1	NC_028846
CP026080.1	NC_028914
NZ_CP026063.1/CP026063.1	NC_028860
CP026064.1	NC_028778
NZ_CP026067.1/CP026067.1	NC_028912
NZ_CP026070.1/CP026070.1	NC_028784
NZ_CP026071.1/CP026071.1	NC_028960
CP026077.1	NC_028828
NZ_CP026079.1/CP026079.1	NC_028757
NZ_CP026066.1/CP026066.1	NC_028906
NZ_CP026068.1/CP026068.1	NC_028941
NZ_CP026069.1/CP026069.1	NC_028802
NZ_CP026072.1/CP026072.1	NC_028934
NZ_CP026073.1/CP026073.1	NC_028801
CP026098.1	NC_028910
CP026074.1	NC_028788
CP026052.1	NC_028851
CP025791.1	NC_028758
CP025792.1	NC_028746
CP025794.1	NC_028854
CP025796.1	NC_028930
CP025799.1	NC_028767
CP010805.1	NC_028837
CP010595.1	NC_029012
CP025776.1	NC_029014
NZ_CP010749.1/CP010749.1	NC_028940
NZ_CP010756.1/CP010756.1	NC_029032
NZ_CP010745.1/CP010745.1	NC_028998
CP025778.1	NC_028924
NZ_CP025593.1/CP025593.1	NC_028763
NZ_CP025594.1/CP025594.1	NC_028955
NZ_CP025595.1/CP025595.1	NC_028967
NZ_CP025601.1/CP025601.1	NC_028812
NZ_CP025604.1/CP025604.1	NC_028762
NZ_CP025605.1/CP025605.1	NC_028916
NZ_CP025608.1/CP025608.1	NC_028819
NZ_CP025598.1/CP025598.1	NC_028919
NZ_CP025603.1/CP025603.1	NC_028745
NZ_CP025607.1/CP025607.1	NC_028836
NZ_CP025596.1/CP025596.1	NC_028885
NZ_CP025597.1/CP025597.1	NC_028971
NZ_CP025599.1/CP025599.1	NC_028817
NZ_CP025602.1/CP025602.1	NC_029017
NZ_CP025606.1/CP025606.1	NC_028980
CP025716.1	NC_028770
CP025757.1	NC_028931
CP025754.1	NC_028879
CP019809.1	NC_028809
CP019800.1	NC_028933
CP019801.1	NC_028999
CP019803.1	NC_028882
CP019804.1	NC_028939
CP019802.1	NC_028899
CP019805.1	NC_028988
CP019806.1	NC_029007
CP019807.1	NC_028950
CP019810.1	NC_028954
CP019811.1	NC_029003
CP019812.1	NC_029015
CP019814.1	NC_028754
CP019816.1	NC_028945
CP019817.1	NC_028775
CP019818.1	NC_028917
CP019820.1	NC_028859
CP019822.1	NC_028915
CP019824.1	NC_029025
CP019825.1	NC_029010
CP019826.1	NC_028821
CP019827.1	NC_028962
CP019828.1	NC_028765
CP019832.1	NC_028862
CP019834.1	NC_028913
CP019837.1	NC_028864
CP019808.1	NC_029000
CP019813.1	NC_029019
CP019815.1	NC_029030
CP019819.1	NC_028984
CP019821.1	NC_028904
CP019823.1	NC_028892
CP019829.1	NC_028976
CP019830.1	NC_028827
CP019831.1	NC_028807
CP019833.1	NC_028952
CP019835.1	NC_028818
CP019836.1	NC_028974
NZ_CP025749.1/CP025749.1	NC_029005
NZ_CP025750.1/CP025750.1	NC_029031
CP025747.1	NC_028865
CP025707.1	NC_028966
CP025704.1	NC_028829
NZ_CP025800.1/CP025800.1	NC_028799
CP025682.1	NC_028895
CP025676.1	NC_028820
CP025696.1	NC_028850
NZ_CP025627.1/CP025627.1	NC_028247
CP025611.1	NC_028743
CP019066.1	NC_028742
CP025586.1	NC_028744
CP025590.1	NC_028675
CP024995.1	NC_028684
CP014150.1	NC_028679
CP025581.1	NC_028692
CP025583.1	NC_028672
CP025582.1	NC_028663
CP013843.1	NC_028702
CP013849.1	NC_028683
CP013701.1	NC_028695
CP013841.1	NC_028656
CP013845.1	NC_028693
CP013847.1	NC_028671
CP013850.1	NC_028660
CP014151.1	NC_028668
CP014219.1	NC_028673
CP014174.1	NC_028665
CP025543.1	NC_028653
CP025545.1	NC_028651
CP025542.1	NC_028686
CP019186.1	NC_028664
CP019201.1	NC_028670
CP019189.1	NC_028688
NZ_CP015568.1/CP015568.1	NC_028659
CP023863.1	NC_028691
CP021114.1	NC_028682
CP025001.1	NC_028678
CP025225.1	NC_028689
CP025223.1	NC_028690
CP020618.1	NC_028687
CP016491.1	NC_028680
CP018867.1	NC_028662
CP018622.1	NC_028681
CP017780.1	NC_028674
NZ_CP018889.1/CP018889.1	NC_028654
CP018863.1	NC_028658
CP019600.1	NC_028694
CP025541.1	NC_028652
NZ_CP025537.1/CP025537.1	NC_028661
CP022522.1	NC_028657
CP018937.1	NC_028677
CP018321.1	NC_028696
CP016327.1	NC_028699
CP013943.1	NC_028701
CP016343.1	NC_028698
NZ_CP015444.1/CP015444.1	NC_028685
NZ_CP015496.1/CP015496.1	NC_028676
NZ_CP015498.1/CP015498.1	NC_028669
CP019320.1	NC_028697
CP019086.1	NC_028666
CP019092.1	NC_028700
CP019085.1	NC_028655
CP019089.1	NC_028449
CP019090.1	NC_028667
CP019091.1	NC_029065
CP019087.1	NC_028840
CP019088.1	NC_027983
CP021885.1	NC_027995
CP021011.1	NC_027987
CP020713.1	NC_027986
CP020714.1	NC_027992
CP024134.1	NC_027988
CP024138.1	NC_027979
CP024141.1	NC_027994
CP024147.1	NC_027993
CP024127.1	NC_027984
CP024131.1	NC_027990
CP024155.1	NC_027982
CP025429.1	NC_027985
CP025491.1	NC_027991
CP025435.1	NC_028831
CP025425.1	NC_028927
CP023780.1	NC_028901
CP023784.1	NC_028780
CP023794.1	NC_028448
CP023789.1	NC_028248
CP023804.1	NC_029070
CP023799.1	NC_029001
CP023808.1	NC_027633
CP025442.1	NC_027636
CP025438.1	NC_027637
CP025440.1	NC_027642
CP025443.1	NC_027645
CP025456.1	NC_028977
CP025466.1	NC_027634
CP025461.1	NC_027635
CP025520.1	NC_027638
CP025511.1	NC_027639
CP025515.1	NC_027640
CP025430.1	NC_027641
CP025298.1	NC_027643
CP025533.1	NC_027644
CP025534.1	NC_027646
NZ_CP025408.1/CP025408.1	NC_027647
NZ_CP025407.1/CP025407.1	NC_027648
CP025412.1	NC_027629
CP017453.1	NC_027625
CP017454.1	NC_027628
CP025085.1	NC_027620
CP025399.1	NC_027630
CP025400.1	NC_027623
CP025404.1	NC_027626
CP025406.1	NC_027624
CP025405.1	NC_027627
CP025401.1	NC_027622
CP025394.1	NC_027621
NZ_LT578418.1/LT578418.1	NC_027332
LT962688.1	NC_027334
CP018757.1	NC_027355
LT578453.1	NC_027352
CP025395.1	NC_027366
LT897797.1	NC_027374
CP025341.1	NC_027372
LT969520.1	NC_027394
NZ_CP025495.1/CP025495.1	NC_027331
NZ_CP025328.1/CP025328.1	NC_027350
NZ_CP019154.1/CP019154.1	NC_027348
NZ_CP024199.1/CP024199.1	NC_027398
NZ_CP025197.1/CP025197.1	NC_027339
NZ_CP025299.1/CP025299.1	NC_027360
NZ_CP025309.1/CP025309.1	NC_027335
NZ_CP025281.1/CP025281.1	NC_027340
CP025311.1	NC_027387
CP025316.1	NC_027369
CP025312.1	NC_027330
CP025313.1	NC_027349
NZ_CP025308.1/CP025308.1	NC_027364
NZ_CP021640.1/CP021640.1	NC_027381
NZ_CP025257.1/CP025257.1	NC_027378
NZ_CP025258.1/CP025258.1	NC_027383
NZ_CP025256.1/CP025256.1	NC_027337
NZ_CP025264.1/CP025264.1	NC_027395
NZ_CP025266.1/CP025266.1	NC_027356
NZ_CP025259.1/CP025259.1	NC_027399
NZ_CP025268.1/CP025268.1	NC_027341
CP025229.1	NC_027377
NZ_CP022407.1/CP022407.1	NC_027358
CP025209.1	NC_027365
CP025216.1	NC_027336
CP017948.1	NC_027357
CP017950.1	NC_027373
CP025120.1	NC_027391
CP015194.1	NC_027400
CP021390.1	NC_027333
CP021384.1	NC_027359
CP021385.1	NC_027361
CP021386.1	NC_027385
CP021388.1	NC_027401
CP021387.1	NC_027362
CP021389.1	NC_027367
CP021391.1	NC_027389
CP021393.1	NC_027386
CP021392.1	NC_027346
CP021394.1	NC_027370
CP021552.1	NC_027295
CP021554.1	NC_027354
CP021558.1	NC_027371
CP021553.1	NC_027363
CP021557.1	NC_027379
CP021555.1	NC_027390
CP021556.1	NC_027342
CP021559.1	NC_027384
CP023193.1	NC_027345
CP023194.1	NC_027388
CP023195.1	NC_027375
CP023196.1	NC_027296
CP023197.1	NC_027402
CP023198.1	NC_027351
CP023199.1	NC_027344
CP023192.1	NC_027329
CP025135.1	NC_027297
CP025122.1	NC_027382
NZ_CP025143.1/CP025143.1	NC_027396
NZ_CP025140.1/CP025140.1	NC_027299
NZ_CP025146.1/CP025146.1	NC_027393
CP025096.1	NC_027397
CP025117.1	NC_027404
CP025118.1	NC_027294
CP025116.1	NC_027292
CP025115.1	NC_027293
CP025119.1	NC_027204
CP025113.1	NC_027125
CP025095.1	NC_027130
CP021707.1	NC_027132
NZ_CP025077.1/CP025077.1	NC_021190
NZ_CP025082.1/CP025082.1	NC_027120
CP025057.1	NC_027119
CP024785.1	NC_027118
CP020370.1	NC_026923
CP017768.1	NC_026928
CP021913.1	NC_026927
NZ_CP022435.1/CP022435.1	NC_026924
CP023398.1	NC_026926
CP016928.1	NC_026665
CP024912.1	NC_026606
CP017432.1	NC_026611
CP017766.1	NC_026609
CP017767.1	NC_026583
CP018061.1	NC_026593
CP016355.1	NC_026604
CP022488.1	NC_026585
CP017999.1	NC_026590
CP025076.1	NC_026595
CP018838.1	NC_026596
CP024655.1	NC_026603
NZ_CP017601.1/CP017601.1	NC_026605
CP017602.1	NC_026598
CP025080.1	NC_026584
CP018306.1	NC_026589
NZ_CP019383.1/CP019383.1
CP015524.1
CP015526.1
CP025003.1
CP025030.1
CP018259.1
NZ_CP025023.1/CP025023.1
CP018260.1
CP017803.1
CP025044.1
CP025045.1
CP025046.1
CP025047.1
CP025018.1
NZ_CP025043.1/CP025043.1
CP025027.1
CP025028.1
CP025029.1
CP025026.1
CP025049.1
CP025050.1
CP025051.1
CP025053.1
CP025055.1
CP025056.1
CP025005.1
CP025008.1
CP025037.1
CP025048.1
CP025036.1
LT883142.1
CP024985.1
CP024969.1
NZ_CP024955.1/CP024955.1
CP024962.1
CP024968.1
CP025000.1
CP024967.1
CP024964.1
CP024966.1
CP024931.1
CP024963.1
CP024965.1
NZ_CP024970.1/CP024970.1
CP024932.1
CP024956.1
NZ_CP024930.1/CP024930.1
NZ_CP024933.1/CP024933.1
CP024987.1
NZ_CP024974.1/CP024974.1
CP024954.1
CP024958.1
CP024998.1
CP024801.1
CP024997.1
CP025084.1
LT960781.1
LT962928.1
LT963350.1
LT962945.1
LT962940.1
LT962947.1
LT962910.1
LT962943.1
LT962914.1
LT962926.1
LT962922.1
LT962916.1
LT962924.1
LT962912.1
LT962920.1
LT962918.1
LT963348.1
LT962930.1
LT962932.1
LT962938.1
LT962934.1
LT962936.1
LT962953.1
LT962951.1
LT962949.1
NZ_CP024911.1/CP024911.1
CP018799.1
CP018800.1
CP011797.1
CP024920.1
CP024894.1
NZ_CP024923.1/CP024923.1
CP024880.1
CP024883.1
CP024885.1
CP024898.1
CP024881.1
CP024897.1
CP024922.1
CP024889.1
CP024886.1
NZ_CP019574.1/CP019574.1
CP024870.1
CP024602.1
CP023345.1
CP024808.1
CP024845.1
LT634361.1
CP024843.1
CP024185.2
CP024812.1
CP024819.1
CP024838.1
CP024834.1
CP022290.1
CP022291.1
CP024830.1
CP024851.1
CP024859.1
CP024815.1
CP024826.1
CP024821.1
CP024862.1
CP024855.1
NZ_CP021497.1/CP021497.1
NZ_CP022438.1/CP022438.1
CP024899.1
NZ_CP022548.1/CP022548.1
NZ_CP017310.1/CP017310.1
NZ_CP017319.1/CP017319.1
CP024744.1
CP024745.1
CP024746.1
CP024747.1
CP024748.1
NZ_CP017787.1/CP017787.1
NZ_CP017730.1/CP017730.1
NZ_CP017731.1/CP017731.1
NZ_CP017732.1/CP017732.1
NZ_CP017733.1/CP017733.1
NZ_CP017736.1/CP017736.1
NZ_CP017737.1/CP017737.1
NZ_CP017738.1/CP017738.1
NZ_CP017739.1/CP017739.1
NZ_CP017740.1/CP017740.1
NZ_CP017741.1/CP017741.1
NZ_CP017742.1/CP017742.1
NZ_CP017743.1/CP017743.1
NZ_CP017745.1/CP017745.1
NZ_CP017746.1/CP017746.1
NZ_CP017719.1/CP017719.1
CP022986.1
NZ_CP017940.1/CP017940.1
NZ_CP024698.1/CP024698.1
NZ_CP024699.1/CP024699.1
NZ_CP024700.1/CP024700.1
NZ_CP024701.1/CP024701.1
NZ_CP024780.1/CP024780.1
NZ_CP024702.1/CP024702.1
NZ_CP024696.1/CP024696.1
NZ_CP024697.1/CP024697.1
NZ_CP024703.1/CP024703.1
NZ_CP022550.1/CP022550.1
NZ_CP024704.1/CP024704.1
NZ_CP024727.1/CP024727.1
NZ_CP024723.1/CP024723.1
NZ_CP024731.1/CP024731.1
NZ_CP024705.1/CP024705.1
NZ_CP024725.1/CP024725.1
NZ_CP024729.1/CP024729.1
NZ_CP024732.1/CP024732.1
NZ_CP024734.1/CP024734.1
NZ_CP024749.1/CP024749.1
NZ_CP024712.1/CP024712.1
NZ_CP024647.1/CP024647.1
CP024781.1
NZ_CP024653.1/CP024653.1
NZ_CP024797.1/CP024797.1
CP024706.1
NZ_CP024650.2/CP024650.2
NZ_CP024720.1/CP024720.1
NZ_CP024717.1/CP024717.1
CP024649.1
NZ_CP024610.1/CP024610.1
NZ_CP024644.1/CP024644.1
NZ_CP024645.1/CP024645.1
NZ_CP024632.1/CP024632.1
NZ_CP024635.1/CP024635.1
NZ_CP024611.1/CP024611.1
NZ_CP024613.1/CP024613.1
NZ_CP024612.1/CP024612.1
NZ_CP024619.1/CP024619.1
NZ_CP024090.1/CP024090.1
NZ_CP020964.1/CP020964.1
NZ_CP018044.1/CP018044.1
NZ_CP020967.1/CP020967.1
NZ_CP020975.1/CP020975.1
NZ_CP017792.1/CP017792.1
NZ_CP017797.1/CP017797.1
NZ_CP021849.1/CP021849.1
NZ_CP020987.1/CP020987.1
NZ_CP020989.1/CP020989.1
NZ_CP020998.1/CP020998.1
NZ_CP021001.1/CP021001.1
NZ_CP021006.1/CP021006.1
NZ_CP020979.1/CP020979.1
NZ_CP020981.1/CP020981.1
NZ_CP020983.1/CP020983.1
NZ_CP020985.1/CP020985.1
NZ_CP020992.1/CP020992.1
NZ_CP021015.1/CP021015.1
NZ_CP021018.1/CP021018.1
NZ_CP018133.1/CP018133.1
NZ_CP024124.1/CP024124.1
CP020971.1
CP021012.1
NZ_CP017994.1/CP017994.1
NZ_CP018056.1/CP018056.1
NZ_CP018635.1/CP018635.1
NZ_CP018640.1/CP018640.1
NZ_CP018642.1/CP018642.1
NZ_CP018644.1/CP018644.1
NZ_CP018645.1/CP018645.1
NZ_CP018647.1/CP018647.1
NZ_CP018655.1/CP018655.1
NZ_CP018657.1/CP018657.1
NZ_CP018659.1/CP018659.1
NZ_CP018661.1/CP018661.1
NZ_CP018633.1/CP018633.1
NZ_CP018637.1/CP018637.1
NZ_CP018648.1/CP018648.1
NZ_CP018651.1/CP018651.1
NZ_CP024588.1/CP024588.1
NZ_CP018092.1/CP018092.1
NZ_CP023737.1/CP023737.1
NZ_CP024608.1/CP024608.1
CP024176.2
CP024180.2
CP024443.2
NZ_CP024596.1/CP024596.1
NZ_CP024601.1/CP024601.1
NZ_CP024600.1/CP024600.1
NZ_CP024591.1/CP024591.1
NZ_CP024592.1/CP024592.1
NZ_CP024593.1/CP024593.1
NZ_CP024594.1/CP024594.1
NZ_CP024595.1/CP024595.1
NZ_CP024453.1/CP024453.1
NZ_CP024455.1/CP024455.1
NZ_CP024597.1/CP024597.1
NZ_CP024598.1/CP024598.1
NZ_CP024451.1/CP024451.1
NZ_CP024599.1/CP024599.1
NZ_CP024478.1/CP024478.1
NZ_CP024576.1/CP024576.1
NZ_CP024477.1/CP024477.1
NZ_CP024489.1/CP024489.1
NZ_CP024482.1/CP024482.1
NZ_CP024496.1/CP024496.1
NZ_CP024458.1/CP024458.1
NZ_CP024563.1/CP024563.1
NZ_CP024542.1/CP024542.1
NZ_CP024504.1/CP024504.1
NZ_CP024515.1/CP024515.1
NZ_CP024521.1/CP024521.1
NZ_CP024528.1/CP024528.1
NZ_CP024535.1/CP024535.1
NZ_CP024545.1/CP024545.1
NZ_CP024548.1/CP024548.1
NZ_CP024549.1/CP024549.1
NZ_CP024556.1/CP024556.1
NZ_CP024570.1/CP024570.1
NZ_CP024499.1/CP024499.1
NZ_CP024201.1/CP024201.1
NZ_CP024411.1/CP024411.1
NZ_CP024422.1/CP024422.1
NZ_CP023663.1/CP023663.1
NZ_CP024420.1/CP024420.1
NZ_CP024162.1/CP024162.1
NZ_CP024413.1/CP024413.1
NZ_CP024315.1/CP024315.1
NZ_CP024204.1/CP024204.1
NZ_CP024205.1/CP024205.1
NZ_CP024316.1/CP024316.1
NZ_CP024333.1/CP024333.1
NZ_CP024282.1/CP024282.1
NZ_CP024351.1/CP024351.1
NZ_CP024371.1/CP024371.1
NZ_CP024390.1/CP024390.1
CP024466.1
NZ_CP024203.1/CP024203.1
NZ_CP024418.1/CP024418.1
CP024473.1
NZ_CP024191.1/CP024191.1
NZ_CP024165.1/CP024165.1
NZ_CP024168.1/CP024168.1
NZ_CP024169.1/CP024169.1
NZ_CP024228.1/CP024228.1
NZ_CP024232.1/CP024232.1
NZ_CP024239.1/CP024239.1
NZ_CP024240.1/CP024240.1
NZ_CP024256.1/CP024256.1
NZ_CP024257.1/CP024257.1
NZ_CP024260.1/CP024260.1
NZ_CP024278.1/CP024278.1
NZ_CP024223.1/CP024223.1
NZ_CP024243.1/CP024243.1
NZ_CP024245.1/CP024245.1
NZ_CP024263.1/CP024263.1
NZ_CP024269.1/CP024269.1
NZ_CP024273.1/CP024273.1
NZ_CP024275.1/CP024275.1
NZ_CP024289.1/CP024289.1
CP024164.1
CP024252.1
CP024266.1
NZ_LT960777.1/LT960777.1
NZ_LT960788.1/LT960788.1
NZ_LT960790.1/LT960790.1
NZ_LT960784.1/LT960784.1
NZ_CP024123.1/CP024123.1
NZ_CP024091.1/CP024091.1
NZ_CP024160.1/CP024160.1
NZ_CP024161.1/CP024161.1
NZ_CP024028.1/CP024028.1
NZ_CP024159.1/CP024159.1
NZ_CP024086.1/CP024086.1
NZ_CP024085.1/CP024085.1
NZ_CP024126.1/CP024126.1
NZ_CP024457.1/CP024457.1
NZ_LT903847.1/LT903847.1
NZ_CP022479.1/CP022479.1
NZ_CP020742.1/CP020742.1
NZ_CP022426.1/CP022426.1
CP024442.1
NZ_CP017638.1/CP017638.1
NZ_CP017696.1/CP017696.1
NZ_CP017702.1/CP017702.1
NZ_CP017705.1/CP017705.1
NZ_CP017713.1/CP017713.1
NZ_CP017706.1/CP017706.1
NZ_CP017695.1/CP017695.1
NZ_CP017697.1/CP017697.1
NZ_CP023298.1/CP023298.1
NZ_CP017690.1/CP017690.1
CP019489.1
NZ_CP015287.1/CP015287.1
NZ_CP016818.1/CP016818.1
NZ_CP018014.1/CP018014.1
NZ_CP018020.1/CP018020.1
NZ_CP015244.1/CP015244.1
CP024013.1
NZ_CP024034.1/CP024034.1
NZ_CP024035.1/CP024035.1
NZ_CP024049.1/CP024049.1
NZ_LT960614.1/LT960614.1
NZ_CP024011.1/CP024011.1
CP024051.1
CP023048.1
CP024198.1
NZ_CP024050.1/CP024050.1
NZ_CP023859.1/CP023859.1
CP023487.1
NZ_CP017685.1/CP017685.1
NZ_CP017684.1/CP017684.1
NZ_CP017682.1/CP017682.1
NZ_CP017680.1/CP017680.1
NZ_CP017679.1/CP017679.1
NZ_CP017677.1/CP017677.1
NZ_LT934425.1/LT934425.1
NZ_CP021371.1/CP021371.1
NZ_CP023965.1/CP023965.1
NZ_CP023992.1/CP023992.1
NZ_CP023962.1/CP023962.1
NZ_CP023817.1/CP023817.1
NZ_CP023819.1/CP023819.1
NZ_CP023818.1/CP023818.1
NZ_CP023956.1/CP023956.1
NZ_CP023966.1/CP023966.1
NZ_CP023964.1/CP023964.1
NZ_CP023968.1/CP023968.1
NZ_CP023963.1/CP023963.1
NZ_CP023974.1/CP023974.1
NZ_CP023970.1/CP023970.1
NZ_CP023972.1/CP023972.1
NZ_CP023969.1/CP023969.1
NZ_CP023772.1/CP023772.1
NZ_CP023867.1/CP023867.1
NZ_CP023866.1/CP023866.1
NZ_CP023941.1/CP023941.1
NZ_CP023946.1/CP023946.1
NZ_CP023913.1/CP023913.1
NZ_CP023815.1/CP023815.1
NZ_CP023899.1/CP023899.1
NZ_CP023960.1/CP023960.1
NZ_CP023778.1/CP023778.1
NZ_LT900021.1/LT900021.1
NZ_CP022685.1/CP022685.1
NZ_CP023777.1/CP023777.1
NZ_CP023746.1/CP023746.1
NZ_CP023748.1/CP023748.1
NZ_CP023769.1/CP023769.1
NZ_CP023814.1/CP023814.1
NZ_CP023752.1/CP023752.1
NZ_CP023754.1/CP023754.1
CP023755.1
NZ_LT795114.1/LT795114.1
NZ_CP021435.1/CP021435.1
NZ_CP022699.1/CP022699.1
NZ_CP021766.1/CP021766.1
NZ_LT907988.1/LT907988.1
NZ_CP021404.1/CP021404.1
NZ_CP023705.1/CP023705.1
NZ_CP023741.1/CP023741.1
NZ_CP023735.1/CP023735.1
NZ_CP023736.1/CP023736.1
NZ_CP023706.1/CP023706.1
NZ_CP023720.1/CP023720.1
NZ_CP023729.1/CP023729.1
NZ_CP021652.1/CP021652.1
CP023728.1
NZ_CP018332.1/CP018332.1
NZ_CP022663.1/CP022663.1
NZ_CP022658.1/CP022658.1
NZ_LT576034.1/LT576034.1
NZ_LT576033.1/LT576033.1
NZ_LT576032.1/LT576032.1
NZ_LT576042.1/LT576042.1
NZ_LT576038.1/LT576038.1
NZ_LT576787.1/LT576787.1
NZ_LT593929.1/LT593929.1
NZ_LT599498.1/LT599498.1
NZ_LT604998.1/LT604998.1
NZ_LT618783.1/LT618783.1
NZ_CP023657.1/CP023657.1
NZ_CP023573.1/CP023573.1
NZ_CP023574.1/CP023574.1
NZ_CP023575.1/CP023575.1
NZ_CP023576.1/CP023576.1
NZ_CP023577.1/CP023577.1
NZ_CP023578.1/CP023578.1
NZ_CP023579.1/CP023579.1
NZ_CP023580.1/CP023580.1
NZ_CP023581.1/CP023581.1
NZ_CP023582.1/CP023582.1
NZ_CP023583.1/CP023583.1
NZ_CP023584.1/CP023584.1
NZ_CP023585.1/CP023585.1
NZ_CP023586.1/CP023586.1
NZ_CP023587.1/CP023587.1
NZ_CP023588.1/CP023588.1
NZ_CP023589.1/CP023589.1
NZ_CP023590.1/CP023590.1
NZ_CP023591.1/CP023591.1
NZ_CP023592.1/CP023592.1
NZ_CP023593.1/CP023593.1
NZ_CP023594.1/CP023594.1
NZ_CP023595.1/CP023595.1
NZ_CP023596.1/CP023596.1
NZ_CP023597.1/CP023597.1
NZ_CP023598.1/CP023598.1
NZ_CP023599.1/CP023599.1
NZ_CP023600.1/CP023600.1
NZ_CP023601.1/CP023601.1
NZ_CP023602.1/CP023602.1
NZ_CP023603.1/CP023603.1
NZ_CP023604.1/CP023604.1
NZ_CP023605.1/CP023605.1
NZ_CP023606.1/CP023606.1
NZ_CP023607.1/CP023607.1
NZ_CP023608.1/CP023608.1
NZ_CP023609.1/CP023609.1
NZ_CP023610.1/CP023610.1
NZ_CP023611.1/CP023611.1
NZ_CP023612.1/CP023612.1
NZ_CP023613.1/CP023613.1
NZ_CP023614.1/CP023614.1
NZ_CP023615.1/CP023615.1
NZ_CP023616.1/CP023616.1
NZ_CP023617.1/CP023617.1
NZ_CP023618.1/CP023618.1
NZ_CP023619.1/CP023619.1
NZ_CP023620.1/CP023620.1
NZ_CP023621.1/CP023621.1
NZ_CP023622.1/CP023622.1
NZ_CP023623.1/CP023623.1
NZ_CP023624.1/CP023624.1
NZ_CP023625.1/CP023625.1
NZ_CP023626.1/CP023626.1
NZ_CP023627.1/CP023627.1
NZ_CP023628.1/CP023628.1
NZ_CP023629.1/CP023629.1
NZ_CP023630.1/CP023630.1
NZ_CP023631.1/CP023631.1
NZ_CP023632.1/CP023632.1
NZ_CP023633.1/CP023633.1
NZ_CP023634.1/CP023634.1
NZ_CP023635.1/CP023635.1
NZ_CP023636.1/CP023636.1
NZ_CP023637.1/CP023637.1
NZ_CP023638.1/CP023638.1
NZ_CP023639.1/CP023639.1
NZ_CP023640.1/CP023640.1
NZ_CP023668.1/CP023668.1
NZ_CP023656.1/CP023656.1
NZ_CP017460.1/CP017460.1
NZ_CP022319.1/CP022319.1
NZ_CP023664.1/CP023664.1
NZ_CP023481.1/CP023481.1
NZ_CP017414.1/CP017414.1
NZ_CP017463.1/CP017463.1
NZ_CP017466.1/CP017466.1
NZ_CP023687.1/CP023687.1
NZ_CP023669.1/CP023669.1
NZ_CP023643.1/CP023643.1
NZ_CP023641.1/CP023641.1
NZ_CP023667.1/CP023667.1
NZ_CP023184.1/CP023184.1
NZ_CP017201.1/CP017201.1
NZ_CP017261.1/CP017261.1
NZ_CP022547.1/CP022547.1
NZ_CP018128.1/CP018128.1
NZ_CP017306.1/CP017306.1
CP020753.1
NZ_CP020741.1/CP020741.1
NZ_CP017158.1/CP017158.1
NZ_CP017159.1/CP017159.1
NZ_CP017160.1/CP017160.1
NZ_CP017161.1/CP017161.1
NZ_CP017162.1/CP017162.1
NZ_CP017163.1/CP017163.1
NZ_CP017164.1/CP017164.1
NZ_CP017165.1/CP017165.1
NZ_CP017166.1/CP017166.1
NZ_CP017167.1/CP017167.1
NZ_CP017168.1/CP017168.1
CP023645.1
NZ_CP023564.1/CP023564.1
NZ_CP023558.1/CP023558.1
NZ_CP010681.1/CP010681.1
NZ_CP012621.1/CP012621.1
NZ_LT907975.1/LT907975.1
NZ_CP010643.1/CP010643.1
NZ_CP022196.1/CP022196.1
NZ_CP023548.1/CP023548.1
NZ_CP023563.1/CP023563.1
NZ_CP010767.1/CP010767.1
NZ_CP012737.1/CP012737.1
NZ_CP023539.1/CP023539.1
NZ_LT907989.1/LT907989.1
NZ_CP023545.1/CP023545.1
NZ_CP023543.1/CP023543.1
NZ_LT897836.1/LT897836.1
NZ_CP023515.1/CP023515.1
NZ_CP023536.1/CP023536.1
NZ_CP023529.1/CP023529.1
NZ_CP023504.1/CP023504.1
NZ_CP023497.1/CP023497.1
NZ_CP023501.1/CP023501.1
NZ_CP023507.1/CP023507.1
NZ_CP023510.1/CP023510.1
NZ_CP023527.1/CP023527.1
NZ_CP023537.1/CP023537.1
NZ_CP023522.1/CP023522.1
NZ_CP023525.1/CP023525.1
NZ_CP023168.1/CP023168.1
NZ_CP023505.1/CP023505.1
NZ_CP023511.1/CP023511.1
NZ_CP010784.1/CP010784.1
NZ_CP023518.1/CP023518.1
NZ_CP023499.1/CP023499.1
NZ_CP023516.1/CP023516.1
CP023502.1
NZ_CP023500.1/CP023500.1
NZ_CP023508.1/CP023508.1
NZ_CP023512.1/CP023512.1
NZ_CP023535.1/CP023535.1
NZ_CP023531.1/CP023531.1
CP023474.1
NZ_CP023483.1/CP023483.1
NZ_CP010673.1/CP010673.1
NZ_CP010588.1/CP010588.1
NZ_CP010636.1/CP010636.1
NZ_CP021047.1/CP021047.1
NZ_CP021040.1/CP021040.1
NZ_CP023445.1/CP023445.1
NZ_CP023449.1/CP023449.1
NZ_CP023454.1/CP023454.1
NZ_CP023464.1/CP023464.1
NZ_CP023465.1/CP023465.1
NZ_CP023439.1/CP023439.1
NZ_CP023466.1/CP023466.1
NZ_CP023448.1/CP023448.1
NZ_CP009725.1/CP009725.1
NZ_CP010348.1/CP010348.1
NZ_CP009727.1/CP009727.1
NZ_CP009929.1/CP009929.1
NZ_CP009729.1/CP009729.1
NZ_CP009731.1/CP009731.1
NZ_CP009733.1/CP009733.1
NZ_CP009735.1/CP009735.1
NZ_CP009737.1/CP009737.1
NZ_CP009739.1/CP009739.1
NZ_CP009741.1/CP009741.1
NZ_CP009931.1/CP009931.1
NZ_CP023406.1/CP023406.1
NZ_CP023422.1/CP023422.1
NZ_CP023415.1/CP023415.1
NZ_CP018624.1/CP018624.1
NZ_CP018630.1/CP018630.1
NZ_CP023429.1/CP023429.1
NZ_CP023435.1/CP023435.1
NZ_CP023423.1/CP023423.1
NZ_CP023431.1/CP023431.1
NZ_CP023541.1/CP023541.1
NZ_CP017156.1/CP017156.1
NZ_LT907978.1/LT907978.1
NZ_CP017143.1/CP017143.1
NZ_CP023410.1/CP023410.1
NZ_CP016987.1/CP016987.1
NZ_CP017232.1/CP017232.1
NZ_CP017177.1/CP017177.1
NZ_CP022168.1/CP022168.1
NZ_CP023392.1/CP023392.1
NZ_CP023344.1/CP023344.1
NZ_CP011041.1/CP011041.1
NZ_CP011011.1/CP011011.1
NZ_CP011025.1/CP011025.1
NZ_CP011039.1/CP011039.1
NZ_CP011032.1/CP011032.1
NZ_CP011030.1/CP011030.1
NZ_CP023402.1/CP023402.1
NZ_CP023299.1/CP023299.1
NZ_CP023275.1/CP023275.1
NZ_CP023313.2/CP023313.2
NZ_CP023315.2/CP023315.2
NZ_CP023314.2/CP023314.2
NZ_CP023310.1/CP023310.1
NZ_CP017082.1/CP017082.1
NZ_CP017085.1/CP017085.1
NZ_CP023404.1/CP023404.1
NZ_CP023403.1/CP023403.1
NZ_CP023320.1/CP023320.1
NZ_CP023395.1/CP023395.1
NZ_CP023391.1/CP023391.1
NZ_CP023390.1/CP023390.1
NZ_CP023359.1/CP023359.1
NZ_CP023357.1/CP023357.1
NZ_CP023364.1/CP023364.1
NZ_CP023386.1/CP023386.1
NZ_CP023388.1/CP023388.1
NZ_CP023353.1/CP023353.1
NZ_CP023377.1/CP023377.1
NZ_CP023366.1/CP023366.1
NZ_CP023383.1/CP023383.1
NZ_CP023371.1/CP023371.1
NZ_AP017968.1/AP017968.1
NZ_CP022163.1/CP022163.1
NZ_CP022203.1/CP022203.1
NZ_CP022098.1/CP022098.1
NZ_CP022385.1/CP022385.1
NZ_CP022384.1/CP022384.1
NZ_CP022387.1/CP022387.1
NZ_CP022386.1/CP022386.1
NZ_CP022388.1/CP022388.1
NZ_CP022378.1/CP022378.1
NZ_CP022379.1/CP022379.1
NZ_CP022380.1/CP022380.1
NZ_CP022382.1/CP022382.1
NZ_CP022383.1/CP022383.1
NZ_CP022389.1/CP022389.1
NZ_CP022381.1/CP022381.1
NZ_CP019485.1/CP019485.1
NZ_CP019488.1/CP019488.1
NZ_CP023346.1/CP023346.1
NZ_CP023349.1/CP023349.1
NZ_CP016552.1/CP016552.1
CP021238.1
NZ_CP023284.1/CP023284.1
NZ_CP014136.1/CP014136.1
NZ_LT900217.1/LT900217.1
NZ_CP014137.1/CP014137.1
NZ_CP023074.1/CP023074.1
NZ_CP023173.1/CP023173.1
CP021173.1
NZ_CP023185.1/CP023185.1
NZ_CP023208.1/CP023208.1
NZ_CP023174.1/CP023174.1
NZ_CP023179.1/CP023179.1
NZ_CP023257.1/CP023257.1
NZ_CP023166.1/CP023166.1
NZ_CP023401.1/CP023401.1
NZ_CP022537.1/CP022537.1
NZ_CP016769.1/CP016769.1
NZ_CP016770.1/CP016770.1
NZ_CP016771.1/CP016771.1
NZ_CP016773.1/CP016773.1
NZ_CP016774.1/CP016774.1
NZ_CP016776.1/CP016776.1
NZ_CP022745.1/CP022745.1
NZ_CP016779.1/CP016779.1
NZ_CP016782.1/CP016782.1
NZ_CP017482.1/CP017482.1
NZ_CP016768.2/CP016768.2
NZ_CP023063.1/CP023063.1
NZ_CP023067.1/CP023067.1
NZ_CP016772.1/CP016772.1
NZ_CP016780.1/CP016780.1
NZ_CP016775.1/CP016775.1
NZ_CP006803.1/CP006803.1
NZ_CP016777.1/CP016777.1
NZ_CP021060.1/CP021060.1
NZ_CP016778.1/CP016778.1
NZ_CP016783.1/CP016783.1
NZ_CP023070.1/CP023070.1
NZ_CP016781.1/CP016781.1
NZ_CP021199.1/CP021199.1
NZ_CP021200.1/CP021200.1
NZ_CP021201.1/CP021201.1
NZ_CP021246.1/CP021246.1
NZ_CP006804.1/CP006804.1
NZ_CP021118.1/CP021118.1
NZ_CP023155.1/CP023155.1
NZ_CP023159.1/CP023159.1
NZ_CP016878.1/CP016878.1
NZ_CP023147.1/CP023147.1
NZ_CP022961.1/CP022961.1
NZ_CP023141.1/CP023141.1
NZ_CP016303.1/CP016303.1
NZ_CP016305.1/CP016305.1
NZ_CP023202.1/CP023202.1
NZ_CP023049.2/CP023049.2
NZ_CP023149.1/CP023149.1
NZ_CP023146.1/CP023146.1
NZ_CP017062.1/CP017062.1
NZ_CP016304.1/CP016304.1
NZ_CP023151.1/CP023151.1
NZ_CP023054.1/CP023054.1
NZ_CP017063.1/CP017063.1
NZ_CP023044.1/CP023044.1
NZ_CP023046.1/CP023046.1
NZ_CP023047.1/CP023047.1
NZ_CP023043.1/CP023043.1
NZ_CP023139.1/CP023139.1
NZ_CP017064.1/CP017064.1
NZ_CP017066.1/CP017066.1
NZ_CP023052.1/CP023052.1
NZ_CP023050.1/CP023050.1
NZ_CP016956.1/CP016956.1
NZ_CP016957.1/CP016957.1
NZ_CP016958.1/CP016958.1
NZ_CP016959.1/CP016959.1
NZ_CP016960.1/CP016960.1
NZ_CP016961.1/CP016961.1
NZ_CP016962.1/CP016962.1
NZ_CP016963.1/CP016963.1
NZ_CP016964.1/CP016964.1
NZ_CP016966.1/CP016966.1
NZ_CP016967.1/CP016967.1
NZ_CP016968.1/CP016968.1
NZ_CP017119.1/CP017119.1
NZ_CP017120.1/CP017120.1
NZ_CP017121.1/CP017121.1
NZ_CP017122.1/CP017122.1
NZ_CP017123.1/CP017123.1
NZ_CP016965.1/CP016965.1
NZ_CP021288.1/CP021288.1
CP023134.2
NZ_CP022544.1/CP022544.1
NZ_CP023142.1/CP023142.1
NZ_CP018477.1/CP018477.1
NZ_CP022604.1/CP022604.1
NZ_CP022989.1/CP022989.1
NZ_CP022930.1/CP022930.1
NZ_CP023011.2/CP023011.2
NZ_CP022988.1/CP022988.1
NZ_CP022998.1/CP022998.1
NZ_CP017995.1/CP017995.1
NZ_CP023001.1/CP023001.1
NZ_CP022997.1/CP022997.1
NZ_CP022983.1/CP022983.1
NZ_CP018628.1/CP018628.1
NZ_CP022823.1/CP022823.1
NZ_CP022889.1/CP022889.1
NZ_CP022957.1/CP022957.1
NZ_CP022915.1/CP022915.1
NZ_CP022874.1/CP022874.1
NZ_CP022890.1/CP022890.1
NZ_CP022891.1/CP022891.1
NZ_CP022882.1/CP022882.1
NZ_CP022912.1/CP022912.1
NZ_CP022752.1/CP022752.1
NZ_CP022753.1/CP022753.1
NZ_CP022877.1/CP022877.1
NZ_CP022879.1/CP022879.1
NZ_CP022827.1/CP022827.1
NZ_CP022875.1/CP022875.1
NZ_CP022434.1/CP022434.1
NZ_CP022741.1/CP022741.1
NZ_CP022736.1/CP022736.1
NZ_CP022743.1/CP022743.1
NZ_CP022754.1/CP022754.1
NZ_CP022714.1/CP022714.1
NZ_CP017716.1/CP017716.1
NZ_LT906463.1/LT906463.1
NZ_LT906464.1/LT906464.1
NZ_LT906462.1/LT906462.1
NZ_LT906450.1/LT906450.1
NZ_LT906465.1/LT906465.1
NZ_LT906448.1/LT906448.1
NZ_LT906454.1/LT906454.1
NZ_LT906470.1/LT906470.1
NZ_LT906479.1/LT906479.1
NZ_LT899436.1/LT899436.1
NZ_LT906447.1/LT906447.1
NZ_LT906434.1/LT906434.1
NZ_LT906468.1/LT906468.1
NZ_LT906435.1/LT906435.1
NZ_LT906439.1/LT906439.1
NZ_LT906473.1/LT906473.1
NZ_LT906444.1/LT906444.1
NZ_LT906482.1/LT906482.1
NZ_LT906467.1/LT906467.1
NZ_LT906453.1/LT906453.1
NZ_LT906446.1/LT906446.1
NZ_LT906449.1/LT906449.1
NZ_LT906460.1/LT906460.1
NZ_LT906483.1/LT906483.1
NZ_LT906442.1/LT906442.1
NZ_LT906456.1/LT906456.1
NZ_LT906477.1/LT906477.1
NZ_LT906459.1/LT906459.1
NZ_LT906451.1/LT906451.1
NZ_LT906441.1/LT906441.1
NZ_LT906457.1/LT906457.1
NZ_LT906469.1/LT906469.1
NZ_LN832559.1/LN832559.1
NZ_LT906445.1/LT906445.1
NZ_LT906461.1/LT906461.1
NZ_LT906481.1/LT906481.1
NZ_LT906455.1/LT906455.1
NZ_LT906478.1/LT906478.1
NZ_LT906466.1/LT906466.1
NZ_LT906475.1/LT906475.1
NZ_LT906443.1/LT906443.1
NZ_LT906440.1/LT906440.1
NZ_LT906438.1/LT906438.1
NZ_LT906480.1/LT906480.1
NZ_LT906472.1/LT906472.1
NZ_LT906437.1/LT906437.1
NZ_LT906458.1/LT906458.1
NZ_LT906476.1/LT906476.1
NZ_LT906452.1/LT906452.1
NZ_LT906436.1/LT906436.1
NZ_LT906471.1/LT906471.1
NZ_LT906484.1/LT906484.1
NZ_LT906474.1/LT906474.1
NZ_CP022695.1/CP022695.1
CP022928.1
NZ_CP018866.1/CP018866.1
NZ_CP016893.1/CP016893.1
NZ_CP019985.1/CP019985.1
NZ_CP022709.1/CP022709.1
NZ_CP017069.2/CP017069.2
NZ_CP022691.1/CP022691.1
NZ_CP022689.1/CP022689.1
CP022585.1
NZ_CP022657.1/CP022657.1
NZ_CP017692.1/CP017692.1
NZ_CP018058.1/CP018058.1
NZ_CP017703.1/CP017703.1
NZ_CP017704.1/CP017704.1
NZ_CP020017.1/CP020017.1
NZ_CP020815.1/CP020815.1
NZ_CP022653.1/CP022653.1
NZ_CP021172.1/CP021172.1
NZ_CP022606.1/CP022606.1
NZ_CP022665.1/CP022665.1
NZ_CP022614.1/CP022614.1
NZ_CP022654.2/CP022654.2
NZ_CP022573.1/CP022573.1
CP020754.1
NZ_CP021641.1/CP021641.1
NZ_LT904883.1/LT904883.1
NZ_LT904854.1/LT904854.1
NZ_LT904871.1/LT904871.1
NZ_LT904869.1/LT904869.1
NZ_LT904876.1/LT904876.1
NZ_LT904882.1/LT904882.1
NZ_LT904870.1/LT904870.2
NZ_LT904881.1/LT904881.1
NZ_LT904890.1/LT904890.1
NZ_LT904887.1/LT904887.1
NZ_LT904877.1/LT904877.1
NZ_LT904884.1/LT904884.1
NZ_LT904777.1/LT904777.1
NZ_LT905088.1/LT905088.1
NZ_LT905140.1/LT905140.1
NZ_LT904868.1/LT904868.1
NZ_LT904875.1/LT904875.1
NZ_LT904878.1/LT904878.1
NZ_LT904893.1/LT904893.1
NZ_LT904891.1/LT904891.1
NZ_LT904888.1/LT904888.1
NZ_LT905139.1/LT905139.1
NZ_LT904852.1/LT904852.1
NZ_LT904867.1/LT904867.1
NZ_LT904872.1/LT904872.1
NZ_LT904894.1/LT904894.1
NZ_LT905142.1/LT905142.1
NZ_LT904886.1/LT904886.1
NZ_LT905090.1/LT905090.1
LT905060.1
NZ_LT905064.1/LT905064.1
NZ_LT905063.1/LT905063.1
NZ_LT905062.1/LT905062.1
NZ_LT905143.1/LT905143.1
LT905141.1
LT904885.1
NZ_CP016353.1/CP016353.1
NZ_CP016766.1/CP016766.1
NZ_CP020028.1/CP020028.1
NZ_CP021430.1/CP021430.1
NZ_CP014154.1/CP014154.1
CP016836.1
CP014155.1
CP014156.1
NZ_CP021401.1/CP021401.1
NZ_CP021402.1/CP021402.1
NZ_CP021403.1/CP021403.1
NZ_CP022362.1/CP022362.1
NZ_CP016397.1/CP016397.1
NZ_CP016753.1/CP016753.1
NZ_CP022571.1/CP022571.1
NZ_CP022223.1/CP022223.1
NZ_CP022564.1/CP022564.1
CP020336.1
CP020339.1
CP020342.1
CP020086.1
NZ_CP022347.1/CP022347.1
NZ_CP017475.1/CP017475.1
NZ_CP022556.1/CP022556.1
NZ_CP020027.1/CP020027.1
NZ_CP020082.1/CP020082.1
NZ_CP022559.1/CP022559.1
NZ_CP020492.1/CP020492.1
CP022551.1
NZ_CP022530.1/CP022530.1
NZ_CP022535.1/CP022535.1
NZ_CP022528.1/CP022528.1
NZ_CP022529.1/CP022529.1
NZ_CP022540.1/CP022540.1
NZ_CP022527.1/CP022527.1
NZ_CP022532.1/CP022532.1
NZ_CP022531.1/CP022531.1
NZ_CP022526.1/CP022526.1
NZ_CP022525.1/CP022525.1
NZ_CP012379.1/CP012379.1
NZ_CP012380.1/CP012380.1
CP012378.1
AP018040.1
NZ_CP022477.1/CP022477.1
NZ_CP022206.1/CP022206.1
NZ_CP022354.1/CP022354.1
AP018340.1
NZ_CP022515.1/CP022515.1
NZ_CP022521.1/CP022521.1
NZ_CP022464.2/CP022464.2
NZ_CP022524.1/CP022524.1
NZ_CP022470.1/CP022470.1
CP022500.1
CP022503.1
NZ_CP022467.1/CP022467.1
NZ_CP022489.1/CP022489.1
NZ_CP022491.1/CP022491.1
NZ_CP022494.1/CP022494.1
NZ_CP022490.1/CP022490.1
NZ_CP022497.1/CP022497.1
CP022504.1
NZ_CP022552.1/CP022552.1
NZ_CP022437.1/CP022437.1
NZ_CP022474.1/CP022474.1
NZ_CP020459.1/CP020459.1
NZ_CP022121.1/CP022121.1
NZ_CP022449.1/CP022449.1
NZ_CP022475.1/CP022475.1
NZ_CP022427.1/CP022427.1
NZ_CP012882.1/CP012882.1
NZ_CP022436.1/CP022436.1
NZ_CP013004.1/CP013004.1
NZ_CP013006.1/CP013006.1
NZ_CP022445.1/CP022445.1
NZ_CP022439.1/CP022439.1
NZ_CP022440.1/CP022440.1
NZ_CP022450.1/CP022450.1
CP022459.1
CP022455.1
CP022457.1
NZ_CP019338.1/CP019338.1
NZ_CP022415.1/CP022415.1
NZ_CP022423.1/CP022423.1
NZ_CP022412.2/CP022412.2
NZ_CP022413.2/CP022413.2
NZ_LT900338.1/LT900338.1
NZ_CP022345.1/CP022345.1
NZ_CP022409.1/CP022409.1
NZ_CP011036.1/CP011036.1
NZ_CP011028.1/CP011028.1
NZ_CP022473.1/CP022473.1
NZ_CP019683.1/CP019683.1
NZ_CP019684.1/CP019684.1
NZ_CP019685.1/CP019685.1
NZ_CP019682.1/CP019682.1
NZ_CP018924.1/CP018924.1
NZ_CP018927.1/CP018927.1
NZ_CP018923.1/CP018923.1
NZ_CP018929.1/CP018929.1
NZ_CP018930.1/CP018930.1
NZ_CP018915.1/CP018915.1
NZ_CP018917.1/CP018917.1
NZ_CP016914.1/CP016914.1
NZ_CP018925.1/CP018925.1
NZ_CP018926.1/CP018926.1
NZ_CP018928.1/CP018928.1
NZ_CP017098.1/CP017098.1
NZ_CP018919.1/CP018919.1
NZ_CP020564.1/CP020564.1
NZ_CP022433.1/CP022433.1
NZ_CP011835.1/CP011835.1
NZ_CP022372.1/CP022372.1
NZ_CP022392.1/CP022392.1
NZ_CP022374.1/CP022374.1
NZ_CP022394.1/CP022394.1
NZ_CP022373.1/CP022373.1
NZ_CP017060.1/CP017060.1
NZ_CP016629.1/CP016629.1
NZ_CP016754.1/CP016754.1
NZ_CP022393.1/CP022393.1
NZ_CP016755.1/CP016755.1
NZ_AP018338.1/AP018338.1
NZ_CP015267.1/CP015267.1
NZ_CP015272.1/CP015272.1
NZ_CP015278.1/CP015278.1
NZ_CP022336.1/CP022336.1
NZ_CP022263.1/CP022263.1
NZ_CP022267.1/CP022267.1
NZ_CP022270.1/CP022270.1
NZ_CP022315.1/CP022315.1
NZ_CP022355.1/CP022355.1
NZ_CP022358.1/CP022358.1
NZ_CP022340.1/CP022340.1
NZ_CP022353.1/CP022353.1
NZ_CP022316.1/CP022316.1
NZ_CP019958.1/CP019958.1
NZ_CP022348.1/CP022348.1
NZ_CP022341.1/CP022341.1
NZ_CP022278.1/CP022278.1
NZ_CP022282.1/CP022282.1
NZ_CP016360.1/CP016360.1
NZ_CP022287.1/CP022287.1
AP018336.1
NZ_AP017649.1/AP017649.1
NZ_LT899687.1/LT899687.1
NZ_LT635474.1/LT635474.1
NZ_LT635458.1/LT635458.1
NZ_LT635460.1/LT635460.1
NZ_LT635459.1/LT635459.1
NZ_LT635476.1/LT635476.1
NZ_LT635471.1/LT635471.1
NZ_LT635473.1/LT635473.1
NZ_LT635456.1/LT635456.1
NZ_LT635478.1/LT635478.1
NZ_LT635472.1/LT635472.1
NZ_LT635477.1/LT635477.1
NZ_LT837687.1/LT837687.1
NZ_LT838273.1/LT838273.1
NZ_CP018145.1/CP018145.1
NZ_CP014636.1/CP014636.1
NZ_CP018632.1/CP018632.1
NZ_CP022272.1/CP022272.1
CP020122.1
CP020916.1
NZ_CP020360.1/CP020360.1
NZ_CP020361.1/CP020361.1
NZ_CP020362.1/CP020362.1
NZ_CP020363.1/CP020363.1
NZ_CP022247.1/CP022247.1
NZ_CP020364.1/CP020364.1
NZ_CP022273.1/CP022273.1
NZ_CP019584.1/CP019584.1
NZ_CP016595.1/CP016595.1
NZ_CP017293.1/CP017293.1
NZ_CP011915.1/CP011915.1
CP012112.1
CP014752.1
NZ_CP018308.1/CP018308.1
NZ_CP014854.1/CP014854.1
NZ_CP014855.1/CP014855.1
NZ_CP018311.1/CP018311.1
NZ_CP015101.1/CP015101.1
NZ_CP015102.1/CP015102.1
NZ_CP015103.1/CP015103.1
NZ_CP015105.1/CP015105.1
NZ_CP015106.1/CP015106.1
NZ_CP014862.1/CP014862.1
NZ_CP015193.1/CP015193.1
NZ_CP016278.1/CP016278.1
NZ_CP022115.1/CP022115.1
NZ_CP015104.1/CP015104.1
NZ_CP021329.1/CP021329.1
NZ_CP016270.1/CP016270.1
NZ_CP016315.1/CP016315.1
NZ_CP016316.1/CP016316.1
NZ_CP017234.1/CP017234.1
NZ_CP008813.1/CP008813.1
NZ_CP017229.1/CP017229.1
NZ_CP016398.1/CP016398.1
NZ_CP016828.1/CP016828.1
NZ_CP019964.1/CP019964.1
NZ_CP022175.1/CP022175.1
NZ_CP022186.1/CP022186.1
NZ_CP022181.1/CP022181.1
NZ_CP022207.1/CP022207.1
NZ_CP022204.1/CP022204.1
NZ_CP007167.1/CP007167.1
NZ_CP007168.1/CP007168.1
NZ_CP007169.1/CP007169.1
NZ_CP007170.1/CP007170.1
NZ_CP007171.1/CP007171.1
NZ_CP022164.1/CP022164.1
NZ_CP022133.1/CP022133.1
NZ_CP022132.1/CP022132.1
NZ_CP022130.1/CP022130.1
CP022114.1
NZ_CP022120.1/CP022120.1
NZ_CP021980.1/CP021980.1
NZ_CP022101.1/CP022101.1
NZ_CP022099.1/CP022099.1
NZ_CP022103.1/CP022103.1
NZ_CP022151.1/CP022151.1
NZ_CP022122.1/CP022122.1
NZ_CP022123.1/CP022123.1
NZ_CP022148.1/CP022148.1
CP022124.1
NZ_CP008821.1/CP008821.1
NZ_CP007007.1/CP007007.1
NZ_CP007008.1/CP007008.1
NZ_CP007009.1/CP007009.1
NZ_CP007010.1/CP007010.1
NZ_CP007011.1/CP007011.1
NZ_CP007017.1/CP007017.1
NZ_CP007018.1/CP007018.1
NZ_CP007019.1/CP007019.1
NZ_CP007020.1/CP007020.1
NZ_CP007021.1/CP007021.1
NZ_CP007194.1/CP007194.1
NZ_CP007195.1/CP007195.1
NZ_CP007196.1/CP007196.1
NZ_CP007197.1/CP007197.1
NZ_CP007198.1/CP007198.1
NZ_CP007199.1/CP007199.1
NZ_CP007200.1/CP007200.1
NZ_CP007459.1/CP007459.1
NZ_CP008837.1/CP008837.1
NZ_CP007460.1/CP007460.1
NZ_CP007461.1/CP007461.1
NZ_CP007462.1/CP007462.1
NZ_CP007525.1/CP007525.1
NZ_CP007526.1/CP007526.1
NZ_CP008836.1/CP008836.1
NZ_CP022127.1/CP022127.1
NZ_CP022116.1/CP022116.1
NZ_CP022117.1/CP022117.1
NZ_CP022135.1/CP022135.1
NZ_CP022138.1/CP022138.1
NZ_CP022139.1/CP022139.1
NZ_CP022142.1/CP022142.1
NZ_CP022154.1/CP022154.1
NZ_AP018052.1/AP018052.1
NZ_CP021782.1/CP021782.1
NZ_CP019649.1/CP019649.1
NZ_CP022129.1/CP022129.1
CP022073.2
NZ_CP022106.1/CP022106.1
NZ_CP022022.1/CP022022.1
NZ_CP022040.1/CP022040.1
CP022056.2
CP022089.2
CP022093.2
CP022059.2
NZ_CP011252.1/CP011252.1
CP022044.2
NZ_CP022076.1/CP022076.1
NZ_CP022077.1/CP022077.1
NZ_CP022079.1/CP022079.1
NZ_CP022080.1/CP022080.1
NZ_CP022023.1/CP022023.1
NZ_CP017115.1/CP017115.1
CP022062.2
CP022069.2
CP022070.1
NZ_CP021646.1/CP021646.1
NZ_CP022005.1/CP022005.1
NZ_CP020946.1/CP020946.1
NZ_CP017990.1/CP017990.1
NZ_CP022014.1/CP022014.1
NZ_CP022020.1/CP022020.1
NZ_CP022003.1/CP022003.1
NZ_CP022034.1/CP022034.1
NZ_CP022017.1/CP022017.1
CP022015.1
NZ_AP018281.1/AP018281.1
NZ_AP018203.1/AP018203.1
NZ_AP018172.1/AP018172.1
NZ_AP018280.1/AP018280.1
NZ_AP018254.1/AP018254.1
NZ_AP018255.1/AP018255.1
NZ_CP021992.1/CP021992.1
NZ_CP022110.1/CP022110.1
NZ_CP020917.1/CP020917.1
NZ_CP021996.1/CP021996.1
NZ_CP021987.1/CP021987.1
NZ_CP021988.1/CP021988.1
NZ_CP021990.1/CP021990.1
NZ_CP021991.1/CP021991.1
NZ_CP016321.1/CP016321.1
CP021989.1
NZ_CP021976.1/CP021976.1
NZ_CP021997.1/CP021997.1
NZ_CP021999.1/CP021999.1
NZ_CP022000.1/CP022000.1
NZ_CP022002.1/CP022002.1
NZ_CP022001.1/CP022001.1
NZ_CP017090.1/CP017090.1
NZ_CP017091.1/CP017091.1
NZ_CP021904.1/CP021904.1
NZ_CP021920.1/CP021920.1
NZ_CP021927.1/CP021927.1
NZ_CP021922.1/CP021922.1
NZ_CP021911.1/CP021911.1
NZ_CP021896.1/CP021896.1
NZ_CP021902.1/CP021902.1
NZ_CP021889.1/CP021889.1
NZ_CP021892.1/CP021892.1
NZ_CP021921.1/CP021921.1
NZ_CP021903.1/CP021903.1
NZ_CP021982.1/CP021982.1
CP021888.1
CP021890.1
[truncated: 3,836 more rows]

## Sheet: Fugi genome
ftp://ftp.ncbi.nlm.nih.gov/genomes/all/GCF/001/477/545/GCF_001477545.1_Pneu_cari_B80_V3
ftp://ftp.ncbi.nlm.nih.gov/genomes/all/GCF/001/638/985/GCF_001638985.1_Phybl2
ftp://ftp.ncbi.nlm.nih.gov/genomes/all/GCF/000/002/945/GCF_000002945.1_ASM294v2
ftp://ftp.ncbi.nlm.nih.gov/genomes/all/GCF/000/149/845/GCF_000149845.2_SJ5
ftp://ftp.ncbi.nlm.nih.gov/genomes/all/GCF/000/150/505/GCF_000150505.1_SO6
ftp://ftp.ncbi.nlm.nih.gov/genomes/all/GCF/001/661/405/GCF_001661405.1_Cybja1
ftp://ftp.ncbi.nlm.nih.gov/genomes/all/GCF/001/983/325/GCF_001983325.1_ASM198332v1
ftp://ftp.ncbi.nlm.nih.gov/genomes/all/GCF/001/417/885/GCF_001417885.1_Kmar_1.0
ftp://ftp.ncbi.nlm.nih.gov/genomes/all/GCF/000/209/165/GCF_000209165.1_ASM20916v1
ftp://ftp.ncbi.nlm.nih.gov/genomes/all/GCF/001/661/235/GCF_001661235.1_Picme2
ftp://ftp.ncbi.nlm.nih.gov/genomes/all/GCF/001/661/255/GCF_001661255.1_Wican1
ftp://ftp.ncbi.nlm.nih.gov/genomes/all/GCF/000/149/425/GCF_000149425.1_ASM14942v1
ftp://ftp.ncbi.nlm.nih.gov/genomes/all/GCF/000/146/045/GCF_000146045.2_R64
ftp://ftp.ncbi.nlm.nih.gov/genomes/all/GCF/000/243/375/GCF_000243375.1_ASM24337v1
ftp://ftp.ncbi.nlm.nih.gov/genomes/all/GCF/000/002/525/GCF_000002525.2_ASM252v1
ftp://ftp.ncbi.nlm.nih.gov/genomes/all/GCF/000/026/365/GCF_000026365.1_ASM2636v1
ftp://ftp.ncbi.nlm.nih.gov/genomes/all/GCF/000/006/445/GCF_000006445.2_ASM644v2
ftp://ftp.ncbi.nlm.nih.gov/genomes/all/GCF/002/102/565/GCF_002102565.1_Kocim1
ftp://ftp.ncbi.nlm.nih.gov/genomes/all/GCF/000/354/255/GCF_000354255.1_CocheC4_1
ftp://ftp.ncbi.nlm.nih.gov/genomes/all/GCF/000/523/435/GCF_000523435.1_Cochliobolus_carbonum_v1.0
ftp://ftp.ncbi.nlm.nih.gov/genomes/all/GCF/000/230/375/GCF_000230375.1_ASM23037v1
ftp://ftp.ncbi.nlm.nih.gov/genomes/all/GCF/000/149/585/GCF_000149585.1_ASM14958v1
ftp://ftp.ncbi.nlm.nih.gov/genomes/all/GCF/001/890/905/GCF_001890905.1_Aspac1
ftp://ftp.ncbi.nlm.nih.gov/genomes/all/GCF/000/002/715/GCF_000002715.2_ASM271v1
ftp://ftp.ncbi.nlm.nih.gov/genomes/all/GCF/000/006/275/GCF_000006275.2_JCVI-afl1-v2.0
ftp://ftp.ncbi.nlm.nih.gov/genomes/all/GCF/000/002/855/GCF_000002855.3_ASM285v2
ftp://ftp.ncbi.nlm.nih.gov/genomes/all/GCF/000/184/455/GCF_000184455.2_ASM18445v3
ftp://ftp.ncbi.nlm.nih.gov/genomes/all/GCF/003/019/875/GCF_003019875.1_Amore1
ftp://ftp.ncbi.nlm.nih.gov/genomes/all/GCF/900/079/805/GCF_900079805.1_Fusarium_fujikuroi_IMI58289_V2
ftp://ftp.ncbi.nlm.nih.gov/genomes/all/GCF/000/182/925/GCF_000182925.2_NC12
ftp://ftp.ncbi.nlm.nih.gov/genomes/all/GCF/000/226/545/GCF_000226545.1_ASM22654v1
ftp://ftp.ncbi.nlm.nih.gov/genomes/all/GCF/000/182/805/GCF_000182805.2_ASM18280v2
ftp://ftp.ncbi.nlm.nih.gov/genomes/all/GCF/000/146/945/GCF_000146945.2_ASM14694v2
ftp://ftp.ncbi.nlm.nih.gov/genomes/all/GCF/000/091/045/GCF_000091045.1_ASM9104v1
ftp://ftp.ncbi.nlm.nih.gov/genomes/all/GCF/000/149/245/GCF_000149245.1_CNA3
ftp://ftp.ncbi.nlm.nih.gov/genomes/all/GCF/000/149/385/GCF_000149385.1_ASM14938v1
ftp://ftp.ncbi.nlm.nih.gov/genomes/all/GCF/000/271/645/GCF_000271645.1_Treme1
ftp://ftp.ncbi.nlm.nih.gov/genomes/all/GCF/000/328/475/GCF_000328475.2_Umaydis521_2.0
ftp://ftp.ncbi.nlm.nih.gov/genomes/all/GCF/000/711/695/GCF_000711695.1_Tilletiaria_anomala_UBC_951_v1.0
ftp://ftp.ncbi.nlm.nih.gov/genomes/all/GCF/000/320/785/GCF_000320785.1_RHOziaDV1.0
ftp://ftp.ncbi.nlm.nih.gov/genomes/all/GCF/000/149/925/GCF_000149925.1_ASM14992v1
ftp://ftp.ncbi.nlm.nih.gov/genomes/all/GCF/000/271/585/GCF_000271585.1_Trametes_versicolor_v1.0
ftp://ftp.ncbi.nlm.nih.gov/genomes/all/GCF/000/143/185/GCF_000143185.1_v1.0
ftp://ftp.ncbi.nlm.nih.gov/genomes/all/GCF/000/300/555/GCF_000300555.1_Agabi_varbur_1
ftp://ftp.ncbi.nlm.nih.gov/genomes/all/GCF/000/300/575/GCF_000300575.1_Agabi_varbisH97_2
ftp://ftp.ncbi.nlm.nih.gov/genomes/all/GCF/000/182/895/GCF_000182895.1_CC3
ftp://ftp.ncbi.nlm.nih.gov/genomes/all/GCF/000/182/965/GCF_000182965.3_ASM18296v3
ftp://ftp.ncbi.nlm.nih.gov/genomes/all/GCF/000/002/545/GCF_000002545.3_ASM254v2
ftp://ftp.ncbi.nlm.nih.gov/genomes/all/GCF/000/006/335/GCF_000006335.3_ASM633v3
ftp://ftp.ncbi.nlm.nih.gov/genomes/all/GCF/000/149/335/GCF_000149335.2_ASM14933v2
ftp://ftp.ncbi.nlm.nih.gov/genomes/all/GCF/000/149/955/GCF_000149955.1_ASM14995v2
ftp://ftp.ncbi.nlm.nih.gov/genomes/all/GCF/000/240/135/GCF_000240135.3_ASM24013v3
ftp://ftp.ncbi.nlm.nih.gov/genomes/all/GCF/003/025/095/GCF_003025095.1_Triha_v1.0
ftp://ftp.ncbi.nlm.nih.gov/genomes/all/GCF/000/151/425/GCF_000151425.1_ASM15142v1
ftp://ftp.ncbi.nlm.nih.gov/genomes/all/GCF/001/642/055/GCF_001642055.1_Altal1
ftp://ftp.ncbi.nlm.nih.gov/genomes/all/GCF/001/661/265/GCF_001661265.1_Saico1
ftp://ftp.ncbi.nlm.nih.gov/genomes/all/GCF/001/720/155/GCF_001720155.1_Tsuc_wing_CBS7118_V1
ftp://ftp.ncbi.nlm.nih.gov/genomes/all/GCF/000/230/625/GCF_000230625.1_Exop_derm_V1
ftp://ftp.ncbi.nlm.nih.gov/genomes/all/GCF/000/091/225/GCF_000091225.1_ASM9122v1
ftp://ftp.ncbi.nlm.nih.gov/genomes/all/GCF/000/225/545/GCF_000225545.1_AOL24927_1.0
ftp://ftp.ncbi.nlm.nih.gov/genomes/all/GCF/000/146/915/GCF_000146915.1_ASM14691v2
ftp://ftp.ncbi.nlm.nih.gov/genomes/all/GCF/000/237/345/GCF_000237345.1_ASM23734v1
ftp://ftp.ncbi.nlm.nih.gov/genomes/all/GCF/000/227/115/GCF_000227115.2_ASM22711v2
ftp://ftp.ncbi.nlm.nih.gov/genomes/all/GCF/001/664/035/GCF_001664035.1_Metbi1
ftp://ftp.ncbi.nlm.nih.gov/genomes/all/GCF/000/769/745/GCF_000769745.1_ASM76974v1
ftp://ftp.ncbi.nlm.nih.gov/genomes/all/GCF/000/150/675/GCF_000150675.1_ASM15067v2
ftp://ftp.ncbi.nlm.nih.gov/genomes/all/GCF/000/277/815/GCF_000277815.2_ASM27781v3
ftp://ftp.ncbi.nlm.nih.gov/genomes/all/GCF/000/003/125/GCF_000003125.1_JCVI-TSTA1-3.0
ftp://ftp.ncbi.nlm.nih.gov/genomes/all/GCF/000/002/515/GCF_000002515.2_ASM251v1
ftp://ftp.ncbi.nlm.nih.gov/genomes/all/GCF/000/170/995/GCF_000170995.1_TRIVI_v2.0
ftp://ftp.ncbi.nlm.nih.gov/genomes/all/GCF/000/143/565/GCF_000143565.1_V1.0
ftp://ftp.ncbi.nlm.nih.gov/genomes/all/GCF/001/329/695/GCF_001329695.1_Rhoba1_1
ftp://ftp.ncbi.nlm.nih.gov/genomes/all/GCF/000/961/545/GCF_000961545.1_S_schenckii_v1
ftp://ftp.ncbi.nlm.nih.gov/genomes/all/GCF/000/149/035/GCF_000149035.1_C_graminicola_M1_001_V1
ftp://ftp.ncbi.nlm.nih.gov/genomes/all/GCF/000/091/025/GCF_000091025.4_ASM9102v4
ftp://ftp.ncbi.nlm.nih.gov/genomes/all/GCF/000/149/615/GCF_000149615.1_ASM14961v1
ftp://ftp.ncbi.nlm.nih.gov/genomes/all/GCF/000/003/515/GCF_000003515.1_ASM351v2
ftp://ftp.ncbi.nlm.nih.gov/genomes/all/GCF/001/653/265/GCF_001653265.1_ASM165326v1
ftp://ftp.ncbi.nlm.nih.gov/genomes/all/GCF/000/708/205/GCF_000708205.1_Mixia_osmundae_v1.0
ftp://ftp.ncbi.nlm.nih.gov/genomes/all/GCF/003/184/785/GCF_003184785.1_Aspjap1
ftp://ftp.ncbi.nlm.nih.gov/genomes/all/GCF/000/226/115/GCF_000226115.1_ASM22611v1
ftp://ftp.ncbi.nlm.nih.gov/genomes/all/GCF/000/150/035/GCF_000150035.1_ASM15003v1
ftp://ftp.ncbi.nlm.nih.gov/genomes/all/GCF/000/149/645/GCF_000149645.1_ASM14964v1
ftp://ftp.ncbi.nlm.nih.gov/genomes/all/GCF/000/315/645/GCF_000315645.1_PdigPd1_v1
ftp://ftp.ncbi.nlm.nih.gov/genomes/all/GCF/000/145/635/GCF_000145635.1_Gae_graminis_V2
ftp://ftp.ncbi.nlm.nih.gov/genomes/all/GCF/000/003/835/GCF_000003835.1_ASM383v1
ftp://ftp.ncbi.nlm.nih.gov/genomes/all/GCF/000/149/685/GCF_000149685.1_ASM14968v1
ftp://ftp.ncbi.nlm.nih.gov/genomes/all/GCF/000/001/985/GCF_000001985.1_JCVI-PMFA1-2.0
ftp://ftp.ncbi.nlm.nih.gov/genomes/all/GCF/000/185/945/GCF_000185945.1_ASM18594v1
ftp://ftp.ncbi.nlm.nih.gov/genomes/all/GCF/000/143/365/GCF_000143365.1_ASM14336v1
ftp://ftp.ncbi.nlm.nih.gov/genomes/all/GCF/000/151/645/GCF_000151645.1_ASM15164v1
ftp://ftp.ncbi.nlm.nih.gov/genomes/all/GCF/000/527/765/GCF_000527765.1_Cochliobolus_victoriae_v1.0
ftp://ftp.ncbi.nlm.nih.gov/genomes/all/GCF/000/213/175/GCF_000213175.1_v2.0
ftp://ftp.ncbi.nlm.nih.gov/genomes/all/GCF/000/988/165/GCF_000988165.1_ASM98816v1
ftp://ftp.ncbi.nlm.nih.gov/genomes/all/GCF/000/835/455/GCF_000835455.1_Fons_pedr_CBS_271_37_V1
ftp://ftp.ncbi.nlm.nih.gov/genomes/all/GCF/000/264/905/GCF_000264905.1_Stehi1
ftp://ftp.ncbi.nlm.nih.gov/genomes/all/GCF/000/143/535/GCF_000143535.2_ASM14353v4
ftp://ftp.ncbi.nlm.nih.gov/genomes/all/GCF/001/204/775/GCF_001204775.1_ASM120477v1
ftp://ftp.ncbi.nlm.nih.gov/genomes/all/GCF/001/890/105/GCF_001890105.1_Aspzo1
ftp://ftp.ncbi.nlm.nih.gov/genomes/all/GCF/002/847/045/GCF_002847045.1_Aspcand1
ftp://ftp.ncbi.nlm.nih.gov/genomes/all/GCF/002/847/485/GCF_002847485.1_Aspcam1
ftp://ftp.ncbi.nlm.nih.gov/genomes/all/GCF/001/890/805/GCF_001890805.1_Aspgl1
ftp://ftp.ncbi.nlm.nih.gov/genomes/all/GCF/001/477/535/GCF_001477535.1_Pneu_jiro_RU7_V2
ftp://ftp.ncbi.nlm.nih.gov/genomes/all/GCF/000/026/945/GCF_000026945.1_ASM2694v1
ftp://ftp.ncbi.nlm.nih.gov/genomes/all/GCF/000/231/115/GCF_000231115.1_Vitt_corn_V1
ftp://ftp.ncbi.nlm.nih.gov/genomes/all/GCF/000/585/565/GCF_000585565.1_Capr_epim_CBS_606_96_V1
ftp://ftp.ncbi.nlm.nih.gov/genomes/all/GCF/000/585/585/GCF_000585585.1_Capr_coro_CBS_617_96_V1
ftp://ftp.ncbi.nlm.nih.gov/genomes/all/GCF/000/338/995/GCF_000338995.1_Cocsa1
ftp://ftp.ncbi.nlm.nih.gov/genomes/all/GCF/000/149/985/GCF_000149985.1_ASM14998v1
ftp://ftp.ncbi.nlm.nih.gov/genomes/all/GCF/000/235/365/GCF_000235365.1_ASM23536v1
ftp://ftp.ncbi.nlm.nih.gov/genomes/all/GCF/001/548/555/GCF_001548555.1_ASM154855v1
ftp://ftp.ncbi.nlm.nih.gov/genomes/all/GCF/002/251/995/GCF_002251995.1_ASM225199v2
ftp://ftp.ncbi.nlm.nih.gov/genomes/all/GCF/001/661/335/GCF_001661335.1_Babin1
ftp://ftp.ncbi.nlm.nih.gov/genomes/all/GCF/001/661/415/GCF_001661415.1_Canta1
ftp://ftp.ncbi.nlm.nih.gov/genomes/all/GCF/003/184/545/GCF_003184545.1_Asphet1
ftp://ftp.ncbi.nlm.nih.gov/genomes/all/GCF/000/167/675/GCF_000167675.1_v2.0
ftp://ftp.ncbi.nlm.nih.gov/genomes/all/GCF/001/661/345/GCF_001661345.1_Ascru1
ftp://ftp.ncbi.nlm.nih.gov/genomes/all/GCF/900/007/375/GCF_900007375.1_ASM90000737v1
ftp://ftp.ncbi.nlm.nih.gov/genomes/all/GCF/002/708/625/GCF_002708625.1_Rhimi1_1
ftp://ftp.ncbi.nlm.nih.gov/genomes/all/GCF/001/447/935/GCF_001447935.1_ASM44793v1
ftp://ftp.ncbi.nlm.nih.gov/genomes/all/GCF/000/146/465/GCF_000146465.1_ASM14646v1
ftp://ftp.ncbi.nlm.nih.gov/genomes/all/GCF/003/025/115/GCF_003025115.1_Trici_v4.0
ftp://ftp.ncbi.nlm.nih.gov/genomes/all/GCF/003/144/115/GCF_003144115.1_Tilwa1
ftp://ftp.ncbi.nlm.nih.gov/genomes/all/GCF/000/281/105/GCF_000281105.1_Coni_apol_CBS100218_V1
ftp://ftp.ncbi.nlm.nih.gov/genomes/all/GCF/000/151/125/GCF_000151125.1_ASM15112v2
ftp://ftp.ncbi.nlm.nih.gov/genomes/all/GCF/000/150/975/GCF_000150975.2_MS_CBS118893
ftp://ftp.ncbi.nlm.nih.gov/genomes/all/GCF/000/151/145/GCF_000151145.1_ASM15114v1
ftp://ftp.ncbi.nlm.nih.gov/genomes/all/GCF/000/151/505/GCF_000151505.1_ASM15150v1
ftp://ftp.ncbi.nlm.nih.gov/genomes/all/GCF/000/171/015/GCF_000171015.1_TRIAT_v2.0
ftp://ftp.ncbi.nlm.nih.gov/genomes/all/GCF/002/105/155/GCF_002105155.1_Lobtra1
ftp://ftp.ncbi.nlm.nih.gov/genomes/all/GCF/000/968/595/GCF_000968595.1_ASM96859v1
ftp://ftp.ncbi.nlm.nih.gov/genomes/all/GCF/000/225/605/GCF_000225605.1_CmilitarisCM01_v01
ftp://ftp.ncbi.nlm.nih.gov/genomes/all/GCF/000/181/695/GCF_000181695.1_ASM18169v1
ftp://ftp.ncbi.nlm.nih.gov/genomes/all/GCF/000/349/305/GCF_000349305.1_ASM34930v2
ftp://ftp.ncbi.nlm.nih.gov/genomes/all/GCF/001/278/385/GCF_001278385.1_MalaPachy
ftp://ftp.ncbi.nlm.nih.gov/genomes/all/GCF/000/226/095/GCF_000226095.1_ASM22609v1
ftp://ftp.ncbi.nlm.nih.gov/genomes/all/GCF/000/271/625/GCF_000271625.1_Conpu1
ftp://ftp.ncbi.nlm.nih.gov/genomes/all/GCF/001/672/515/GCF_001672515.1_ASM167251v1
ftp://ftp.ncbi.nlm.nih.gov/genomes/all/GCF/000/293/215/GCF_000293215.1_Trichosporon_asahii_1
ftp://ftp.ncbi.nlm.nih.gov/genomes/all/GCF/000/417/875/GCF_000417875.1_Pflocc_1.0
ftp://ftp.ncbi.nlm.nih.gov/genomes/all/GCF/000/747/765/GCF_000747765.1_ASM74776v1
ftp://ftp.ncbi.nlm.nih.gov/genomes/all/GCF/000/320/565/GCF_000320565.1_Septoria_musiva_SO2202_v1.0
ftp://ftp.ncbi.nlm.nih.gov/genomes/all/GCF/000/218/685/GCF_000218685.1_v1.0
ftp://ftp.ncbi.nlm.nih.gov/genomes/all/GCF/000/365/165/GCF_000365165.1_Clad_carr_CBS_160_54_V1
ftp://ftp.ncbi.nlm.nih.gov/genomes/all/GCF/000/835/555/GCF_000835555.1_Rhin_mack_CBS_650_93_V1
ftp://ftp.ncbi.nlm.nih.gov/genomes/all/GCF/000/835/475/GCF_000835475.1_Clad_bant_CBS_173_52_V1
ftp://ftp.ncbi.nlm.nih.gov/genomes/all/GCF/000/836/115/GCF_000836115.1_Exop_spin_CBS89968_V1
ftp://ftp.ncbi.nlm.nih.gov/genomes/all/GCF/000/187/405/GCF_000187405.1_MetAcr_May2010
ftp://ftp.ncbi.nlm.nih.gov/genomes/all/GCF/000/359/705/GCF_000359705.1_Setospaeria_trucica_Et28A_v1.0
ftp://ftp.ncbi.nlm.nih.gov/genomes/all/GCF/000/303/195/GCF_000303195.2_FP7
ftp://ftp.ncbi.nlm.nih.gov/genomes/all/GCF/000/523/455/GCF_000523455.1_Cochliobolus_miyabeanus_v1.0
ftp://ftp.ncbi.nlm.nih.gov/genomes/all/GCF/003/025/105/GCF_003025105.1_Trias_v._1.0
ftp://ftp.ncbi.nlm.nih.gov/genomes/all/GCF/000/409/485/GCF_000409485.1_GLAREA
ftp://ftp.ncbi.nlm.nih.gov/genomes/all/GCF/000/192/795/GCF_000192795.1_Vavr_culi_floridensis_V1
ftp://ftp.ncbi.nlm.nih.gov/genomes/all/GCF/002/117/355/GCF_002117355.1_PosplRSB12_1
ftp://ftp.ncbi.nlm.nih.gov/genomes/all/GCF/000/344/685/GCF_000344685.1_Glotr1_1
ftp://ftp.ncbi.nlm.nih.gov/genomes/all/GCF/001/720/205/GCF_001720205.1_Cryp_amyl_CBS6039_V3
ftp://ftp.ncbi.nlm.nih.gov/genomes/all/GCF/001/792/695/GCF_001792695.1_ASM179269v1
ftp://ftp.ncbi.nlm.nih.gov/genomes/all/GCF/000/182/565/GCF_000182565.1_S_punctatus_V1
ftp://ftp.ncbi.nlm.nih.gov/genomes/all/GCF/000/203/795/GCF_000203795.1_v1.0
ftp://ftp.ncbi.nlm.nih.gov/genomes/all/GCF/900/074/925/GCF_900074925.1_version_1
ftp://ftp.ncbi.nlm.nih.gov/genomes/all/GCF/000/236/905/GCF_000236905.1_ASM23690v1
ftp://ftp.ncbi.nlm.nih.gov/genomes/all/GCF/000/275/845/GCF_000275845.1_Dichomitus_squalens_v1.0
ftp://ftp.ncbi.nlm.nih.gov/genomes/all/GCF/001/636/725/GCF_001636725.1_ISF_1.0
ftp://ftp.ncbi.nlm.nih.gov/genomes/all/GCF/000/149/555/GCF_000149555.1_ASM14955v1
ftp://ftp.ncbi.nlm.nih.gov/genomes/all/GCF/000/150/735/GCF_000150735.1_Paracocci_br_Pb18_V2
ftp://ftp.ncbi.nlm.nih.gov/genomes/all/GCF/002/742/065/GCF_002742065.1_CB0940_V2
ftp://ftp.ncbi.nlm.nih.gov/genomes/all/GCF/000/151/355/GCF_000151355.1_v2.0
ftp://ftp.ncbi.nlm.nih.gov/genomes/all/GCF/001/500/285/GCF_001500285.1_Phisc1
ftp://ftp.ncbi.nlm.nih.gov/genomes/all/GCF/000/149/205/GCF_000149205.2_ASM14920v2
ftp://ftp.ncbi.nlm.nih.gov/genomes/all/GCF/000/803/265/GCF_000803265.1_ASM80326v1
ftp://ftp.ncbi.nlm.nih.gov/genomes/all/GCF/000/280/675/GCF_000280675.1_ASM28067v1
ftp://ftp.ncbi.nlm.nih.gov/genomes/all/GCF/000/151/335/GCF_000151335.2_JCVI-cpa1-1.0
ftp://ftp.ncbi.nlm.nih.gov/genomes/all/GCF/000/264/995/GCF_000264995.1_Punctularia_strigosozonata_v1.0
ftp://ftp.ncbi.nlm.nih.gov/genomes/all/GCF/000/204/055/GCF_000204055.1_v1.0
ftp://ftp.ncbi.nlm.nih.gov/genomes/all/GCF/000/271/605/GCF_000271605.1_Fomme1
ftp://ftp.ncbi.nlm.nih.gov/genomes/all/GCF/000/221/225/GCF_000221225.1_CTHT_3.0
ftp://ftp.ncbi.nlm.nih.gov/genomes/all/GCF/000/836/275/GCF_000836275.1_Exop_meso_CBS40295_V1
ftp://ftp.ncbi.nlm.nih.gov/genomes/all/GCF/000/835/515/GCF_000835515.1_Exop_olig_CBS72588_V1
ftp://ftp.ncbi.nlm.nih.gov/genomes/all/GCF/003/144/295/GCF_003144295.1_Acain1
ftp://ftp.ncbi.nlm.nih.gov/genomes/all/GCF/000/392/275/GCF_000392275.1_UCRPA7V03
ftp://ftp.ncbi.nlm.nih.gov/genomes/all/GCF/000/143/105/GCF_000143105.1_Sanger-454-IlluminaPA_2.0
ftp://ftp.ncbi.nlm.nih.gov/genomes/all/GCF/000/300/595/GCF_000300595.1_Phanerochaete_carnosa_HHB-10118-Sp_v1.0
ftp://ftp.ncbi.nlm.nih.gov/genomes/all/GCF/001/883/845/GCF_001883845.1_ASM188384v1
ftp://ftp.ncbi.nlm.nih.gov/genomes/all/GCF/000/400/465/GCF_000400465.1_Wallemia_ichthyophaga_version_1.0
ftp://ftp.ncbi.nlm.nih.gov/genomes/all/GCF/000/836/295/GCF_000836295.1_O_gall_CBS43764
ftp://ftp.ncbi.nlm.nih.gov/genomes/all/GCF/001/642/475/GCF_001642475.1_ASM164247v1
ftp://ftp.ncbi.nlm.nih.gov/genomes/all/GCF/000/349/005/GCF_000349005.2_Pneumo_murina_B123_V4
ftp://ftp.ncbi.nlm.nih.gov/genomes/all/GCF/000/315/875/GCF_000315875.1_ASM31587v1
ftp://ftp.ncbi.nlm.nih.gov/genomes/all/GCF/001/653/235/GCF_001653235.2_ASM165323v2
ftp://ftp.ncbi.nlm.nih.gov/genomes/all/GCF/003/184/925/GCF_003184925.1_Aspvad1
ftp://ftp.ncbi.nlm.nih.gov/genomes/all/GCF/000/365/145/GCF_000365145.1_Phia_euro_CBS_101466_V1
ftp://ftp.ncbi.nlm.nih.gov/genomes/all/GCF/003/184/845/GCF_003184845.1_Aspibe1
ftp://ftp.ncbi.nlm.nih.gov/genomes/all/GCF/002/849/105/GCF_002849105.1_Aspste1
ftp://ftp.ncbi.nlm.nih.gov/genomes/all/GCF/000/576/695/GCF_000576695.1_AUH_PRJEB4427_v1
ftp://ftp.ncbi.nlm.nih.gov/genomes/all/GCF/000/002/495/GCF_000002495.2_MG8
ftp://ftp.ncbi.nlm.nih.gov/genomes/all/GCF/003/184/865/GCF_003184865.1_Asphom1
ftp://ftp.ncbi.nlm.nih.gov/genomes/all/GCF/003/184/525/GCF_003184525.1_Aspscl1
ftp://ftp.ncbi.nlm.nih.gov/genomes/all/GCF/003/184/595/GCF_003184595.1_Asplac1
ftp://ftp.ncbi.nlm.nih.gov/genomes/all/GCF/003/184/755/GCF_003184755.1_Asppip1
ftp://ftp.ncbi.nlm.nih.gov/genomes/all/GCF/003/184/835/GCF_003184835.1_Aspcos1
ftp://ftp.ncbi.nlm.nih.gov/genomes/all/GCF/000/512/585/GCF_000512585.1_Cryp_best_CBS10118_V1
ftp://ftp.ncbi.nlm.nih.gov/genomes/all/GCF/000/512/565/GCF_000512565.1_Cryp_deje_CBS10117_V1
ftp://ftp.ncbi.nlm.nih.gov/genomes/all/GCF/000/403/515/GCF_000403515.1_ASM40351v1
ftp://ftp.ncbi.nlm.nih.gov/genomes/all/GCF/000/223/485/GCF_000223485.1_Spathaspora_passalidarum_v2.0
ftp://ftp.ncbi.nlm.nih.gov/genomes/all/GCF/002/847/465/GCF_002847465.1_Aspnov1
ftp://ftp.ncbi.nlm.nih.gov/genomes/all/GCF/001/662/655/GCF_001662655.1_ASM166265v1
ftp://ftp.ncbi.nlm.nih.gov/genomes/all/GCF/000/835/505/GCF_000835505.1_Exop_xeno_CBS118157_V1
ftp://ftp.ncbi.nlm.nih.gov/genomes/all/GCF/000/464/535/GCF_000464535.1_EPUS
ftp://ftp.ncbi.nlm.nih.gov/genomes/all/GCF/002/865/645/GCF_002865645.1_Melbi2
ftp://ftp.ncbi.nlm.nih.gov/genomes/all/GCF/000/142/805/GCF_000142805.1_ASM14280v1
ftp://ftp.ncbi.nlm.nih.gov/genomes/all/GCF/000/516/985/GCF_000516985.1_PFICI
ftp://ftp.ncbi.nlm.nih.gov/genomes/all/GCF/001/481/775/GCF_001481775.2_TGAM01v2
ftp://ftp.ncbi.nlm.nih.gov/genomes/all/GCF/003/013/735/GCF_003013735.1_Cand_pseudohaemulonii_B12108
ftp://ftp.ncbi.nlm.nih.gov/genomes/all/GCF/000/304/475/GCF_000304475.1_Ka_CBS2517
ftp://ftp.ncbi.nlm.nih.gov/genomes/all/GCF/003/184/745/GCF_003184745.1_Aspuva1
ftp://ftp.ncbi.nlm.nih.gov/genomes/all/GCF/000/512/605/GCF_000512605.1_Cryp_pinu_CBS10737_V1
ftp://ftp.ncbi.nlm.nih.gov/genomes/all/GCF/000/027/005/GCF_000027005.1_ASM2700v1
ftp://ftp.ncbi.nlm.nih.gov/genomes/all/GCF/001/664/045/GCF_001664045.1_Hanpo2
ftp://ftp.ncbi.nlm.nih.gov/genomes/all/GCF/000/507/465/GCF_000507465.1_Kwon_mang_CBS8507_V2
ftp://ftp.ncbi.nlm.nih.gov/genomes/all/GCF/000/585/515/GCF_000585515.1_Clad_yegr_CBS_114405_V1
ftp://ftp.ncbi.nlm.nih.gov/genomes/all/GCF/003/184/765/GCF_003184765.1_Aspacu1
ftp://ftp.ncbi.nlm.nih.gov/genomes/all/GCF/001/189/475/GCF_001189475.1_ASM118947v1
ftp://ftp.ncbi.nlm.nih.gov/genomes/all/GCF/000/814/965/GCF_000814965.1_MBR_1.0
ftp://ftp.ncbi.nlm.nih.gov/genomes/all/GCF/000/721/765/GCF_000721765.1_Aureobasidium_pullulans_var._namibiae_CBS_147.97_v1.0
ftp://ftp.ncbi.nlm.nih.gov/genomes/all/GCF/000/732/125/GCF_000732125.1_ScApio1.0
ftp://ftp.ncbi.nlm.nih.gov/genomes/all/GCF/000/187/425/GCF_000187425.2_MAA_2.0
ftp://ftp.ncbi.nlm.nih.gov/genomes/all/GCF/000/835/495/GCF_000835495.1_Clad_immu_CBS83496_V1
ftp://ftp.ncbi.nlm.nih.gov/genomes/all/GCF/000/280/035/GCF_000280035.1_ASM28003v2
ftp://ftp.ncbi.nlm.nih.gov/genomes/all/GCF/000/250/985/GCF_000250985.1_Nema_parisii_ERTm1_V3
ftp://ftp.ncbi.nlm.nih.gov/genomes/all/GCF/000/439/145/GCF_000439145.1_ASM43914v3
ftp://ftp.ncbi.nlm.nih.gov/genomes/all/GCF/000/348/985/GCF_000348985.1_ASM34898v1
ftp://ftp.ncbi.nlm.nih.gov/genomes/all/GCF/000/313/525/GCF_000313525.1_ASM31352v1
ftp://ftp.ncbi.nlm.nih.gov/genomes/all/GCF/001/641/265/GCF_001641265.1_ASM164126v1
ftp://ftp.ncbi.nlm.nih.gov/genomes/all/GCF/000/298/775/GCF_000298775.1_ASM29877v1
ftp://ftp.ncbi.nlm.nih.gov/genomes/all/GCF/001/661/395/GCF_001661395.1_Hypbu1
ftp://ftp.ncbi.nlm.nih.gov/genomes/all/GCF/000/002/655/GCF_000002655.1_ASM265v1
ftp://ftp.ncbi.nlm.nih.gov/genomes/all/GCF/001/640/025/GCF_001640025.1_ASM164002v2
ftp://ftp.ncbi.nlm.nih.gov/genomes/all/GCF/001/646/965/GCF_001646965.1_ASM164696v1
ftp://ftp.ncbi.nlm.nih.gov/genomes/all/GCF/000/004/155/GCF_000004155.1_SCY4
ftp://ftp.ncbi.nlm.nih.gov/genomes/all/GCF/001/027/345/GCF_001027345.1_Triol1
ftp://ftp.ncbi.nlm.nih.gov/genomes/all/GCF/003/184/585/GCF_003184585.1_Aspsac1
ftp://ftp.ncbi.nlm.nih.gov/genomes/all/GCF/000/836/435/GCF_000836435.1_Fons_mult_CBS_102226_V1
ftp://ftp.ncbi.nlm.nih.gov/genomes/all/GCF/000/320/585/GCF_000320585.1_Heterobasidion_irregulare_v2.0
ftp://ftp.ncbi.nlm.nih.gov/genomes/all/GCF/000/187/245/GCF_000187245.1_Hansenula_2
ftp://ftp.ncbi.nlm.nih.gov/genomes/all/GCF/000/709/125/GCF_000709125.1_Exop_aqua_CBS_119918_V1
ftp://ftp.ncbi.nlm.nih.gov/genomes/all/GCF/000/313/485/GCF_000313485.1_ASM31348v1
ftp://ftp.ncbi.nlm.nih.gov/genomes/all/GCF/000/721/755/GCF_000721755.1_Aureobasidium_pullulans_var._subglaciale_EXF-2481_v1.0
ftp://ftp.ncbi.nlm.nih.gov/genomes/all/GCF/000/219/625/GCF_000219625.1_MYCGR_v2.0
ftp://ftp.ncbi.nlm.nih.gov/genomes/all/GCF/000/150/705/GCF_000150705.2_Paracocci_br_Pb01_V2
ftp://ftp.ncbi.nlm.nih.gov/genomes/all/GCF/000/150/825/GCF_000150825.1_ASM15082v1
ftp://ftp.ncbi.nlm.nih.gov/genomes/all/GCF/000/315/915/GCF_000315915.1_ASM31591v1
ftp://ftp.ncbi.nlm.nih.gov/genomes/all/GCF/001/298/625/GCF_001298625.1_SEUB3.0
ftp://ftp.ncbi.nlm.nih.gov/genomes/all/GCF/000/226/395/GCF_000226395.1_PenChr_Nov2007
ftp://ftp.ncbi.nlm.nih.gov/genomes/all/GCF/000/585/535/GCF_000585535.1_Clad_psam_CBS_110553_V1
ftp://ftp.ncbi.nlm.nih.gov/genomes/all/GCF/003/184/695/GCF_003184695.1_Aspbru1
ftp://ftp.ncbi.nlm.nih.gov/genomes/all/GCF/003/184/625/GCF_003184625.1_Aspneo1
ftp://ftp.ncbi.nlm.nih.gov/genomes/all/GCF/001/831/195/GCF_001831195.1_CORC01
ftp://ftp.ncbi.nlm.nih.gov/genomes/all/GCF/001/619/985/GCF_001619985.1_Xylona_heveae_TC161_v1.0
ftp://ftp.ncbi.nlm.nih.gov/genomes/all/GCF/000/938/715/GCF_000938715.1_LALA0
ftp://ftp.ncbi.nlm.nih.gov/genomes/all/GCF/003/144/205/GCF_003144205.1_Meimi1
ftp://ftp.ncbi.nlm.nih.gov/genomes/all/GCF/003/184/535/GCF_003184535.1_Aspeuc1
ftp://ftp.ncbi.nlm.nih.gov/genomes/all/GCF/001/651/985/GCF_001651985.1_ASM165198v1
ftp://ftp.ncbi.nlm.nih.gov/genomes/all/GCF/000/497/045/GCF_000497045.1_PSEUBRA1
ftp://ftp.ncbi.nlm.nih.gov/genomes/all/GCF/001/907/595/GCF_001907595.1_ASM190759v1
ftp://ftp.ncbi.nlm.nih.gov/genomes/all/GCF/001/642/045/GCF_001642045.1_Parsp1
ftp://ftp.ncbi.nlm.nih.gov/genomes/all/GCF/000/760/515/GCF_000760515.1_UGP1.0
ftp://ftp.ncbi.nlm.nih.gov/genomes/all/GCF/003/144/195/GCF_003144195.1_Cersp1
ftp://ftp.ncbi.nlm.nih.gov/genomes/all/GCF/003/144/245/GCF_003144245.1_Jamsp1
ftp://ftp.ncbi.nlm.nih.gov/genomes/all/GCF/001/299/255/GCF_001299255.1_ASM129925v1
ftp://ftp.ncbi.nlm.nih.gov/genomes/all/GCF/000/003/855/GCF_000003855.2_ASM385v2
ftp://ftp.ncbi.nlm.nih.gov/genomes/all/GCF/003/144/135/GCF_003144135.1_Rhodsp1
ftp://ftp.ncbi.nlm.nih.gov/genomes/all/GCF/000/263/375/GCF_000263375.1_Wallemia_sebi_v1.0
ftp://ftp.ncbi.nlm.nih.gov/genomes/all/GCF/000/338/955/GCF_000338955.1_Bauco1
ftp://ftp.ncbi.nlm.nih.gov/genomes/all/GCF/001/773/325/GCF_001773325.1_ASM177332v1
ftp://ftp.ncbi.nlm.nih.gov/genomes/all/GCF/000/340/215/GCF_000340215.1_Mycfi2
ftp://ftp.ncbi.nlm.nih.gov/genomes/all/GCF/000/223/465/GCF_000223465.1_Candida_tenuis_v1.0

## Sheet: Protozoan genome
ftp://ftp.ncbi.nlm.nih.gov/genomes/all/GCF/000/150/955/GCF_000150955.2_ASM15095v2
ftp://ftp.ncbi.nlm.nih.gov/genomes/all/GCF/000/194/455/GCF_000194455.1_ASM19445v1
ftp://ftp.ncbi.nlm.nih.gov/genomes/all/GCF/000/372/725/GCF_000372725.1_Emiliana_huxleyi_CCMP1516_main_genome_assembly_v1.0
ftp://ftp.ncbi.nlm.nih.gov/genomes/all/GCF/900/000/015/GCF_900000015.1_Plasmopara_halstedii_genome
ftp://ftp.ncbi.nlm.nih.gov/genomes/all/GCF/000/142/945/GCF_000142945.1_ASM14294v1
ftp://ftp.ncbi.nlm.nih.gov/genomes/all/GCF/000/247/585/GCF_000247585.1_PP_INRA-310_V2
ftp://ftp.ncbi.nlm.nih.gov/genomes/all/GCF/000/002/845/GCF_000002845.2_ASM284v2
ftp://ftp.ncbi.nlm.nih.gov/genomes/all/GCF/000/227/135/GCF_000227135.1_ASM22713v2
ftp://ftp.ncbi.nlm.nih.gov/genomes/all/GCF/000/002/725/GCF_000002725.2_ASM272v2
ftp://ftp.ncbi.nlm.nih.gov/genomes/all/GCF/000/234/665/GCF_000234665.1_ASM23466v4
ftp://ftp.ncbi.nlm.nih.gov/genomes/all/GCF/000/002/875/GCF_000002875.2_ASM287v2
ftp://ftp.ncbi.nlm.nih.gov/genomes/all/GCF/000/755/165/GCF_000755165.1_ASM75516v1
ftp://ftp.ncbi.nlm.nih.gov/genomes/all/GCF/000/002/445/GCF_000002445.2_ASM244v1
ftp://ftp.ncbi.nlm.nih.gov/genomes/all/GCF/000/210/295/GCF_000210295.1_ASM21029v1
ftp://ftp.ncbi.nlm.nih.gov/genomes/all/GCF/000/209/065/GCF_000209065.1_ASM20906v1
ftp://ftp.ncbi.nlm.nih.gov/genomes/all/GCF/000/002/825/GCF_000002825.2_ASM282v1
ftp://ftp.ncbi.nlm.nih.gov/genomes/all/GCF/000/002/435/GCF_000002435.1_GL2
ftp://ftp.ncbi.nlm.nih.gov/genomes/all/GCF/000/313/135/GCF_000313135.1_Acastellanii.strNEFF_v1
ftp://ftp.ncbi.nlm.nih.gov/genomes/all/GCF/000/208/925/GCF_000208925.1_JCVI_ESG2_1.0
ftp://ftp.ncbi.nlm.nih.gov/genomes/all/GCF/000/004/985/GCF_000004985.1_V1.0
ftp://ftp.ncbi.nlm.nih.gov/genomes/all/GCF/000/190/715/GCF_000190715.1_v1.0
ftp://ftp.ncbi.nlm.nih.gov/genomes/all/GCF/000/499/425/GCF_000499425.1_EAH001
ftp://ftp.ncbi.nlm.nih.gov/genomes/all/GCF/000/499/545/GCF_000499545.2_ETH001
ftp://ftp.ncbi.nlm.nih.gov/genomes/all/GCF/000/499/605/GCF_000499605.1_EMW001
ftp://ftp.ncbi.nlm.nih.gov/genomes/all/GCF/000/165/345/GCF_000165345.1_ASM16534v1
ftp://ftp.ncbi.nlm.nih.gov/genomes/all/GCF/000/006/515/GCF_000006515.1_JCVI_cmg_v1.0
ftp://ftp.ncbi.nlm.nih.gov/genomes/all/GCF/000/006/565/GCF_000006565.2_TGA4
ftp://ftp.ncbi.nlm.nih.gov/genomes/all/GCF/900/002/375/GCF_900002375.1_PBANKA01
ftp://ftp.ncbi.nlm.nih.gov/genomes/all/GCF/900/002/335/GCF_900002335.2_PCHAS01
ftp://ftp.ncbi.nlm.nih.gov/genomes/all/GCF/000/321/355/GCF_000321355.1_PcynB_1.0
ftp://ftp.ncbi.nlm.nih.gov/genomes/all/GCF/000/002/765/GCF_000002765.4_ASM276v2
ftp://ftp.ncbi.nlm.nih.gov/genomes/all/GCF/000/006/355/GCF_000006355.1_ASM635v1
ftp://ftp.ncbi.nlm.nih.gov/genomes/all/GCF/001/601/855/GCF_001601855.1_ASM160185v1
ftp://ftp.ncbi.nlm.nih.gov/genomes/all/GCF/000/002/415/GCF_000002415.2_ASM241v2
ftp://ftp.ncbi.nlm.nih.gov/genomes/all/GCF/000/956/335/GCF_000956335.1_Plas_frag_nilgiri_V1
ftp://ftp.ncbi.nlm.nih.gov/genomes/all/GCF/000/709/005/GCF_000709005.1_Plas_vinc_vinckei_V1
ftp://ftp.ncbi.nlm.nih.gov/genomes/all/GCF/900/002/385/GCF_900002385.1_PY17X01
ftp://ftp.ncbi.nlm.nih.gov/genomes/all/GCF/000/165/395/GCF_000165395.1_ASM16539v1
ftp://ftp.ncbi.nlm.nih.gov/genomes/all/GCF/000/981/445/GCF_000981445.1_Bbig001
ftp://ftp.ncbi.nlm.nih.gov/genomes/all/GCF/000/691/945/GCF_000691945.2_ASM69194v2
ftp://ftp.ncbi.nlm.nih.gov/genomes/all/GCF/000/342/415/GCF_000342415.1_JCVI-bewag-v1.1
ftp://ftp.ncbi.nlm.nih.gov/genomes/all/GCF/000/003/225/GCF_000003225.3_ASM322v1
ftp://ftp.ncbi.nlm.nih.gov/genomes/all/GCF/000/165/365/GCF_000165365.1_ASM16536v1
ftp://ftp.ncbi.nlm.nih.gov/genomes/all/GCF/000/141/845/GCF_000141845.1_ASM14184v1
ftp://ftp.ncbi.nlm.nih.gov/genomes/all/GCF/000/165/425/GCF_000165425.1_ASM16542v1
ftp://ftp.ncbi.nlm.nih.gov/genomes/all/GCF/000/189/635/GCF_000189635.1_JCVI-TTA1-2.2
ftp://ftp.ncbi.nlm.nih.gov/genomes/all/GCF/000/220/395/GCF_000220395.1_JCVI-IMG1-V.1
ftp://ftp.ncbi.nlm.nih.gov/genomes/all/GCF/000/151/665/GCF_000151665.1_ASM15166v1
ftp://ftp.ncbi.nlm.nih.gov/genomes/all/GCF/000/208/865/GCF_000208865.1_ASM20886v2
ftp://ftp.ncbi.nlm.nih.gov/genomes/all/GCF/000/006/405/GCF_000006405.1_JCVI_PMG_1.0
ftp://ftp.ncbi.nlm.nih.gov/genomes/all/GCF/000/330/505/GCF_000330505.1_EIA2_v2
ftp://ftp.ncbi.nlm.nih.gov/genomes/all/GCF/000/149/405/GCF_000149405.2_ASM14940v2
ftp://ftp.ncbi.nlm.nih.gov/genomes/all/GCF/000/186/865/GCF_000186865.1_v_1.0
ftp://ftp.ncbi.nlm.nih.gov/genomes/all/GCF/000/499/745/GCF_000499745.1_EMH001
ftp://ftp.ncbi.nlm.nih.gov/genomes/all/GCF/000/004/695/GCF_000004695.1_dicty_2.7
ftp://ftp.ncbi.nlm.nih.gov/genomes/all/GCF/000/209/125/GCF_000209125.1_JCVI_EDISG_1.0
ftp://ftp.ncbi.nlm.nih.gov/genomes/all/GCF/000/499/385/GCF_000499385.1_ENH001
ftp://ftp.ncbi.nlm.nih.gov/genomes/all/GCF/000/524/495/GCF_000524495.1_Plas_inui_San_Antonio_1_V1
ftp://ftp.ncbi.nlm.nih.gov/genomes/all/GCF/000/002/975/GCF_000002975.1_ASM297v1
ftp://ftp.ncbi.nlm.nih.gov/genomes/all/GCF/000/315/625/GCF_000315625.1_Guith1
ftp://ftp.ncbi.nlm.nih.gov/genomes/all/GCF/000/149/755/GCF_000149755.1_P.sojae_V3.0
ftp://ftp.ncbi.nlm.nih.gov/genomes/all/GCF/000/740/895/GCF_000740895.1_ASM74089v1
ftp://ftp.ncbi.nlm.nih.gov/genomes/all/GCF/000/691/245/GCF_000691245.1_Tgr_V1
ftp://ftp.ncbi.nlm.nih.gov/genomes/all/GCF/000/240/725/GCF_000240725.1_ASM24072v1
ftp://ftp.ncbi.nlm.nih.gov/genomes/all/GCF/002/999/335/GCF_002999335.1_CcayRef3
ftp://ftp.ncbi.nlm.nih.gov/genomes/all/GCF/000/258/005/GCF_000258005.1_HHA1_v02
ftp://ftp.ncbi.nlm.nih.gov/genomes/all/GCF/000/151/545/GCF_000151545.1_ASM15154v2
ftp://ftp.ncbi.nlm.nih.gov/genomes/all/GCF/000/223/845/GCF_000223845.1_GNI3
ftp://ftp.ncbi.nlm.nih.gov/genomes/all/GCF/000/520/075/GCF_000520075.1_Apha_asta_APO3_V1
ftp://ftp.ncbi.nlm.nih.gov/genomes/all/GCF/000/281/045/GCF_000281045.1_Sap_diclina_VS20_V1
ftp://ftp.ncbi.nlm.nih.gov/genomes/all/GCF/000/520/115/GCF_000520115.1_Apha_inva_NJM9701_V1
ftp://ftp.ncbi.nlm.nih.gov/genomes/all/GCF/001/293/395/GCF_001293395.1_ASM129339v1
ftp://ftp.ncbi.nlm.nih.gov/genomes/all/GCF/001/680/005/GCF_001680005.1_ASM168000v1
ftp://ftp.ncbi.nlm.nih.gov/genomes/all/GCF/000/002/455/GCF_000002455.1_ASM245v1
ftp://ftp.ncbi.nlm.nih.gov/genomes/all/GCF/000/006/425/GCF_000006425.1_ASM642v1
ftp://ftp.ncbi.nlm.nih.gov/genomes/all/GCF/000/203/815/GCF_000203815.1_DFas_2.0
ftp://ftp.ncbi.nlm.nih.gov/genomes/all/GCF/000/787/575/GCF_000787575.1_Asub_2.0
ftp://ftp.ncbi.nlm.nih.gov/genomes/all/GCF/000/257/125/GCF_000257125.1_ENU1_v1
ftp://ftp.ncbi.nlm.nih.gov/genomes/all/GCF/000/018/645/GCF_000018645.1_ASM1864v1
ftp://ftp.ncbi.nlm.nih.gov/genomes/all/GCF/000/142/905/GCF_000142905.1_TheTra_May2010
ftp://ftp.ncbi.nlm.nih.gov/genomes/all/GCF/001/602/025/GCF_001602025.1_ASM160202v1
ftp://ftp.ncbi.nlm.nih.gov/genomes/all/GCF/000/743/755/GCF_000743755.1_ASM74375v1
ftp://ftp.ncbi.nlm.nih.gov/genomes/all/GCF/000/004/825/GCF_000004825.1_PolPal_Dec2009
